# Supplementary material for: Phospholipase A2 from krait Bungarus fasciatus venom induces human cancer cell death in vitro
Source: PeerJ. 2019 Dec 3;7:e8055. doi: 10.7717/peerj.8055 (PMC6896944; doi:10.7717/peerj.8055)
Supplement: Supplemental Information 2 [file peerj-07-8055-s002.xls]

## Sheet: proteins
Protein Group	Protein ID	Accession	-10lgP	Coverage (%)	Coverage (%) BF_3-3	Area BF_3-3	#Peptides	#Unique	#Spec BF_3-3	PTM	Avg. Mass	Description
1	1	sp|Q90WA7|PA2B1_BUNFA	280.82	81	81		82	0	505	Carbamidomethylation; Oxidation (M); Deamidation (NQ)	15853	Basic phospholipase A2 1 OS=Bungarus fasciatus OX=8613 PE=2 SV=1
2	11	sp|A6MEY4|PA2B_BUNFA	270.72	94	94	1880000	76	5	430	Carbamidomethylation; Oxidation (M); Deamidation (NQ); Acetylation (Protein N-term)	15796	Basic phospholipase A2 BFPA OS=Bungarus fasciatus OX=8613 PE=1 SV=1
4	2	sp|P00628|PA2BV_BUNFA	268.03	87	87	254000	66	2	377	Carbamidomethylation; Oxidation (M); Deamidation (NQ)	14737	Basic phospholipase A2 KBf-VA (Fragment) OS=Bungarus fasciatus OX=8613 PE=1 SV=3
3	5	sp|P00629|PA2B3_BUNFA	260.08	79	79		57	0	395	Carbamidomethylation; Oxidation (M); Deamidation (NQ)	14752	Basic phospholipase A2 Vb-2 (Fragment) OS=Bungarus fasciatus OX=8613 PE=1 SV=3
3	6	B2KNL2|B2KNL2_BUNFA	260.08	74	74		57	0	395	Carbamidomethylation; Oxidation (M); Deamidation (NQ)	15854	Phospholipase A2 BF_31 OS=Bungarus fasciatus OX=8613 PE=2 SV=1
3	8	B2KNL7|B2KNL7_BUNFA	259.16	72	72		56	0	391	Carbamidomethylation; Oxidation (M); Deamidation (NQ)	15880	Phospholipase A2 BF-43 OS=Bungarus fasciatus OX=8613 PE=2 SV=1
5	3	B2KNL9|B2KNL9_BUNFA	250.07	82	82	188000000	60	11	243	Carbamidomethylation; Oxidation (M); Deamidation (NQ)	15768	Phospholipase A2 BF-3 OS=Bungarus fasciatus OX=8613 PE=2 SV=1
5	7	sp|Q90WA8|PA2B2_BUNFA	244.46	77	77	188000000	57	11	211	Carbamidomethylation; Oxidation (M); Deamidation (NQ)	15769	Basic phospholipase A2 2 OS=Bungarus fasciatus OX=8613 PE=1 SV=2
6	10	B2KNL1|B2KNL1_BUNFA	214.47	70	70	1430000	37	4	202	Carbamidomethylation; Deamidation (NQ)	15899	Phospholipase A2 BF-16 OS=Bungarus fasciatus OX=8613 PE=2 SV=1
6	82	sp|Q7LZQ6|PA2BD_BUNFA	50.93	52	52		2	0	3	Carbamidomethylation; Deamidation (NQ)	3704	Basic phospholipase A2 13 (Fragment) OS=Bungarus fasciatus OX=8613 PE=1 SV=1
7	4	sp|P00627|PA2B6_BUNFA	214.09	83	83	37800000	36	5	138	Carbamidomethylation; Oxidation (M); Deamidation (NQ)	14701	Basic phospholipase A2 6 (Fragment) OS=Bungarus fasciatus OX=8613 PE=1 SV=3
7	9	B2KNL8|B2KNL8_BUNFA	212.83	72	72	37800000	35	5	112	Carbamidomethylation; Oxidation (M); Deamidation (NQ)	15790	Phospholipase A2 BF-29 OS=Bungarus fasciatus OX=8613 PE=2 SV=1
7	13	B2KNL3|B2KNL3_BUNFA	180.26	46	46	37400000	21	4	40	Carbamidomethylation; Oxidation (M); Deamidation (NQ)	15853	Phospholipase A2 BF-33 OS=Bungarus fasciatus OX=8613 PE=2 SV=1
7	28	B2KNL5|B2KNL5_BUNFA	118.66	25	25	36500000	6	2	13	Carbamidomethylation; Deamidation (NQ)	16288	Phospholipase A2 BF-41 OS=Bungarus fasciatus OX=8613 PE=2 SV=1
11	14	sp|P0C551|PA2A_BUNFA	145.06	51	51	4000000	7	5	9	Carbamidomethylation	15817	Acidic phospholipase A2 KBf-grIB (Fragment) OS=Bungarus fasciatus OX=8613 PE=2 SV=1
11	41	sp|Q802I1|PA2AB_BUNCA	76.22	15	15	77000	2	2	2	Carbamidomethylation	15641	Acidic phospholipase A2 Bc-PL (Fragment) OS=Bungarus candidus OX=92438 PE=2 SV=1
11	141	R4G2N4|R4G2N4_9SAUR	27.96	8	8		1	0	1		12807	PLA2-Aca-97 OS=Acanthophis wellsi OX=239747 PE=2 SV=1
11	142	Q0PL66|Q0PL66_BUNMU	27.96	8	8		1	0	1		13164	Beta-bungarotoxin A8 chain (Fragment) OS=Bungarus multicinctus OX=8616 PE=2 SV=1
11	143	sp|Q9PTA5|PA2BD_BUNMU	27.96	7	7		1	0	1		15322	Basic phospholipase A2 beta-bungarotoxin A-AL4 chain (Fragment) OS=Bungarus multicinctus OX=8616 PE=3 SV=1
11	144	sp|Q9PTA6|PA2BC_BUNMU	27.96	7	7		1	0	1		15786	Basic phospholipase A2 beta-bungarotoxin A-AL3 chain (Fragment) OS=Bungarus multicinctus OX=8616 PE=3 SV=1
11	145	sp|Q8UUH8|PA2BH_LATCO	27.96	6	6		1	0	1		15941	Basic phospholipase A2 PC17 OS=Laticauda colubrina OX=8628 PE=3 SV=1
11	146	R4G7E3|R4G7E3_9SAUR	27.96	6	6		1	0	1		16729	PLA2-Aca-38 OS=Acanthophis wellsi OX=239747 PE=2 SV=1
11	147	sp|Q8UUH7|PA2BK_LATCO	27.96	6	6		1	0	1		17006	Basic phospholipase A2 PC20 OS=Laticauda colubrina OX=8628 PE=3 SV=1
11	148	sp|Q8UUI0|PA2B1_LATCO	27.96	6	6		1	0	1		17165	Basic phospholipase A2 PC1 OS=Laticauda colubrina OX=8628 PE=3 SV=1
11	149	sp|Q8UUH9|PA2B9_LATCO	27.96	6	6		1	0	1		16908	Basic phospholipase A2 PC9 OS=Laticauda colubrina OX=8628 PE=3 SV=1
8	12	sp|P14411|PA2BA_BUNFA	144.56	56	56	55700000	15	9	53	Carbamidomethylation; Deamidation (NQ)	14838	Basic phospholipase A2 10 (Fragment) OS=Bungarus fasciatus OX=8613 PE=1 SV=2
8	109	sp|C1IC46|PA2A1_WALAE	44.79	9	9		1	0	1		15034	Acidic phospholipase A2 PL-I (Fragment) OS=Walterinnesia aegyptia OX=64182 PE=1 SV=1
8	110	sp|C1IC45|PA2A2_WALAE	44.79	9	9		1	0	1		15035	Acidic phospholipase A2 PL-II (Fragment) OS=Walterinnesia aegyptia OX=64182 PE=1 SV=1
9	25	B2KNL4|B2KNL4_BUNFA	120.71	38	38	37500000	11	3	24	Carbamidomethylation; Oxidation (M); Deamidation (NQ)	15950	Phospholipase A2 BF-40 OS=Bungarus fasciatus OX=8613 PE=2 SV=1
9	29	B2KNL6|B2KNL6_BUNFA	86.49	26	26	348000	6	1	10	Carbamidomethylation; Oxidation (M); Deamidation (NQ)	16004	Phospholipase A2 BF-42 OS=Bungarus fasciatus OX=8613 PE=2 SV=1
9	88	sp|Q6SLM2|PA2A1_BUNCE	31.44	5	5		1	0	1	Carbamidomethylation	15058	Acidic phospholipase A2 1 (Fragment) OS=Bungarus caeruleus OX=132961 PE=1 SV=1
9	122	sp|Q9DF33|PA2A2_OPHHA	31.44	5	5		1	0	1	Carbamidomethylation	15901	Acidic phospholipase A2 2 OS=Ophiophagus hannah OX=8665 PE=1 SV=1
9	123	D5J9R6|D5J9R6_9SAUR	31.44	5	5		1	0	1	Carbamidomethylation	16151	Phospholipase a2 isoform 3 OS=Bungarus flaviceps OX=8614 PE=2 SV=1
9	127	D5J9R8|D5J9R8_9SAUR	31.44	5	5		1	0	1	Carbamidomethylation	16394	Beta-bungarotoxin a chain isoform 2 OS=Bungarus flaviceps OX=8614 PE=2 SV=1
9	128	D5J9R7|D5J9R7_9SAUR	31.44	5	5		1	0	1	Carbamidomethylation	16384	Beta-bungarotoxin a chain isoform 1 OS=Bungarus flaviceps OX=8614 PE=2 SV=1
9	129	sp|Q7T1R0|PA2B1_BUNFL	31.44	5	5		1	0	1	Carbamidomethylation	16394	Basic phospholipase A2 beta-bungarotoxin A1 chain OS=Bungarus flaviceps flaviceps OX=8615 PE=1 SV=1
10	15	sp|B7FDI0|CRVP_VIPNI	119.87	23	23	397000	5	1	11	Oxidation (M); Deamidation (NQ)	24612	Cysteine-rich venom protein (Fragment) OS=Vipera nikolskii OX=110206 PE=2 SV=1
10	17	sp|B7FDI1|CRVP_VIPBE	119.87	21	21	397000	5	1	11	Oxidation (M); Deamidation (NQ)	26509	Cysteine-rich venom protein OS=Vipera berus OX=31155 PE=1 SV=1
10	18	sp|Q7ZZN9|CRVP_PROJR	119.87	21	21	397000	5	1	11	Oxidation (M); Deamidation (NQ)	26865	Cysteine-rich venom protein OS=Protobothrops jerdonii OX=242841 PE=1 SV=1
10	19	sp|P79845|CRVP_PROMU	119.87	21	21	397000	5	1	11	Oxidation (M); Deamidation (NQ)	26688	Cysteine-rich venom protein OS=Protobothrops mucrosquamatus OX=103944 PE=2 SV=2
10	20	T2HP25|T2HP25_PROFL	119.87	21	21	397000	5	1	11	Oxidation (M); Deamidation (NQ)	26737	Cysteine rich secretory protein OS=Protobothrops flavoviridis OX=88087 PE=2 SV=1
10	21	A0A077LA61|A0A077LA61_PROEL	119.87	21	21	397000	5	1	11	Oxidation (M); Deamidation (NQ)	26897	Cysteine-rich venom protein OS=Protobothrops elegans OX=88086 PE=2 SV=1
10	22	sp|Q8JI39|CRVP_PROFL	119.87	21	21	397000	5	1	11	Oxidation (M); Deamidation (NQ)	26752	Cysteine-rich venom protein triflin OS=Protobothrops flavoviridis OX=88087 PE=1 SV=1
10	23	A0A077L7I7|A0A077L7I7_PROFL	119.87	20	20	397000	5	1	11	Oxidation (M); Deamidation (NQ)	28943	Cysteine-rich venom protein (Fragment) OS=Protobothrops flavoviridis OX=88087 PE=2 SV=1
10	26	sp|P0DMT4|CRVP_ECHCO	112.44	18	18	397000	4	1	10	Oxidation (M); Deamidation (NQ)	24699	Cysteine-rich venom protein OS=Echis coloratus OX=64175 PE=1 SV=1
10	27	A0A0A1WCN2|A0A0A1WCN2_ECHCO	112.44	17	17	397000	4	1	10	Oxidation (M); Deamidation (NQ)	26686	Cysteine-Rich Secretory Protein B OS=Echis coloratus OX=64175 PE=2 SV=1
10	38	F2Q6F6|F2Q6F6_CERGO	68.77	10	10		2	0	3	Oxidation (M)	26771	Cysteine-rich seceretory protein Pg-CRP OS=Cerrophidion godmani OX=44722 PE=2 SV=1
10	43	F2Q6G0|F2Q6G0_DEIAC	68.77	11	11		2	0	3	Oxidation (M)	24743	Cysteine-rich seceretory protein Da-CRPa (Fragment) OS=Deinagkistrodon acutus OX=36307 PE=2 SV=1
10	44	F2Q6E5|F2Q6E5_CROHD	68.77	11	11		2	0	3	Oxidation (M)	24742	Cysteine-rich seceretory protein Ch-CRPKa (Fragment) OS=Crotalus horridus OX=35024 PE=2 SV=1
10	45	F2Q6E9|F2Q6E9_CROHD	68.77	11	11		2	0	3	Oxidation (M)	24703	Cysteine-rich seceretory protein Ch-CRPIb (Fragment) OS=Crotalus horridus OX=35024 PE=2 SV=1
10	46	F2Q6E8|F2Q6E8_CROHD	68.77	11	11		2	0	3	Oxidation (M)	24745	Cysteine-rich seceretory protein Ch-CRPIa (Fragment) OS=Crotalus horridus OX=35024 PE=2 SV=1
10	47	F2Q6F1|F2Q6F1_CROVI	68.77	11	11		2	0	3	Oxidation (M)	24861	Cysteine-rich seceretory protein Cv-CRP (Fragment) OS=Crotalus viridis OX=8739 PE=2 SV=1
10	48	F2Q6E6|F2Q6E6_CROHD	68.77	11	11		2	0	3	Oxidation (M)	24713	Cysteine-rich seceretory protein Ch-CRPKb (Fragment) OS=Crotalus horridus OX=35024 PE=2 SV=1
10	49	F2Q6F3|F2Q6F3_9SAUR	68.77	11	11		2	0	3	Oxidation (M)	25044	Cysteine-rich seceretory protein Dr-CRPB (Fragment) OS=Daboia russelii OX=8707 PE=2 SV=1
10	50	F2Q6G1|F2Q6G1_DEIAC	68.77	11	11		2	0	3	Oxidation (M)	24748	Cysteine-rich seceretory protein Da-CRPb (Fragment) OS=Deinagkistrodon acutus OX=36307 PE=2 SV=1
10	51	F2Q6E7|F2Q6E7_CROHD	68.77	11	11		2	0	3	Oxidation (M)	24792	Cysteine-rich seceretory protein Ch-CRPKc (Fragment) OS=Crotalus horridus OX=35024 PE=2 SV=1
10	52	G9DCH4|G9DCH4_CROOH	68.77	10	10		2	0	3	Oxidation (M)	26550	Cysteine-rich secretory protein 1 OS=Crotalus oreganus helleri OX=8741 PE=2 SV=1
10	53	G9DCH5|G9DCH5_CROOH	68.77	10	10		2	0	3	Oxidation (M)	26458	Cysteine-rich secretory protein 2 OS=Crotalus oreganus helleri OX=8741 PE=2 SV=1
10	54	T1E6W3|T1E6W3_CROOH	68.77	10	10		2	0	3	Oxidation (M)	26777	CRiSP-CohLL-1 OS=Crotalus oreganus helleri OX=8741 PE=2 SV=1
10	55	T1D6R8|T1D6R8_CROHD	68.77	10	10		2	0	3	Oxidation (M)	26757	Cysteine-rich secretory protein OS=Crotalus horridus OX=35024 PE=2 SV=1
10	56	A0A0K8S072|A0A0K8S072_CROHD	68.77	10	10		2	0	3	Oxidation (M)	26698	Cysteine-rich secretory protein OS=Crotalus horridus OX=35024 PE=3 SV=1
10	57	F2Q6E3|F2Q6E3_AZEFE	68.77	10	10		2	0	3	Oxidation (M)	26682	Cysteine-rich seceretory protein Az-CRP OS=Azemiops feae OX=8773 PE=2 SV=1
10	58	A0A194AMN4|A0A194AMN4_9SAUR	68.77	10	10		2	0	3	Oxidation (M)	26681	Cysteine-rich secretory protein 2 OS=Agkistrodon piscivorus OX=8715 PE=3 SV=1
10	59	T2HPR8|T2HPR8_OVOOK	68.77	10	10		2	0	3	Oxidation (M)	26938	Cysteine rich secretory protein OS=Ovophis okinavensis OX=8769 PE=2 SV=1
10	60	sp|Q7ZT99|CRVP_CROAT	68.77	10	10		2	0	3	Oxidation (M)	26647	Cysteine-rich venom protein catrin OS=Crotalus atrox OX=8730 PE=1 SV=1
10	61	A0A2H4N3D5|A0A2H4N3D5_BOTMO	68.77	10	10		2	0	3	Oxidation (M)	26837	Cysteine-rich Venom Protein Moojin (Fragment) OS=Bothrops moojeni OX=98334 PE=2 SV=1
10	62	F2Q6E4|F2Q6E4_BOTSC	68.77	10	10		2	0	3	Oxidation (M)	26945	Cysteine-rich seceretory protein Bs-CRP OS=Bothriechis schlegelii OX=44725 PE=2 SV=1
10	63	F2Q6E2|F2Q6E2_ATHNI	68.77	10	10		2	0	3	Oxidation (M)	26979	Cysteine-rich seceretory protein An-CRP OS=Atheris nitschei OX=110224 PE=2 SV=1
10	64	F2Q6F4|F2Q6F4_TRIGS	68.77	10	10		2	0	3	Oxidation (M)	26960	Cysteine-rich seceretory protein Og-CRPa OS=Trimeresurus gracilis OX=109781 PE=2 SV=1
10	65	sp|Q7ZTA0|CRVP_AGKPI	68.77	10	10		2	0	3	Oxidation (M)	26681	Cysteine-rich venom protein piscivorin OS=Agkistrodon piscivorus piscivorus OX=8716 PE=1 SV=1
10	66	A0A194ARS4|A0A194ARS4_SISTE	68.77	10	10		2	0	3	Oxidation (M)	26802	Cysteine-rich secretory protein 1b OS=Sistrurus tergeminus OX=8757 PE=3 SV=1
10	67	A0A194APW7|A0A194APW7_SISTE	68.77	10	10		2	0	3	Oxidation (M)	26804	Cysteine-rich secretory protein 1c OS=Sistrurus tergeminus OX=8757 PE=3 SV=1
10	68	A0A194AS36|A0A194AS36_SISMB	68.77	10	10		2	0	3	Oxidation (M)	26775	Cysteine-rich secretory protein 1a OS=Sistrurus miliarius barbouri OX=8759 PE=3 SV=1
10	69	A0A1L8D673|A0A1L8D673_BOTAT	68.77	10	10		2	0	3	Oxidation (M)	26836	BATXCRISP1 OS=Bothrops atrox OX=8725 PE=2 SV=1
10	70	T1DP88|T1DP88_CROOH	68.77	10	10		2	0	3	Oxidation (M)	26778	CRiSP-CohCI-1 OS=Crotalus oreganus helleri OX=8741 PE=2 SV=1
10	71	F2Q6F0|F2Q6F0_CALRH	68.77	10	10		2	0	3	Oxidation (M)	26830	Cysteine-rich seceretory protein Cr-CRP OS=Calloselasma rhodostoma OX=8717 PE=2 SV=1
10	72	A0A194AQ87|A0A194AQ87_SISMB	68.77	10	10		2	0	3	Oxidation (M)	26789	Cysteine-rich secretory protein 1b OS=Sistrurus miliarius barbouri OX=8759 PE=3 SV=1
10	73	A0A194APP6|A0A194APP6_9SAUR	68.77	10	10		2	0	3	Oxidation (M)	26681	Cysteine-rich secretory protein 1 OS=Agkistrodon piscivorus OX=8715 PE=3 SV=1
10	74	sp|Q8JI40|CRVP_GLOBL	68.77	10	10		2	0	3	Oxidation (M)	26914	Cysteine-rich venom protein ablomin OS=Gloydius blomhoffii OX=242054 PE=1 SV=1
10	99	T1DMM9|T1DMM9_CROOH	50.18	7	7		1	0	2	Oxidation (M)	20831	CRiSP-CohID-1 OS=Crotalus oreganus helleri OX=8741 PE=2 SV=1
10	100	F2Q6F2|F2Q6F2_9SAUR	50.18	5	5		1	0	2	Oxidation (M)	26688	Cysteine-rich seceretory protein Dr-CRPK OS=Daboia russelii OX=8707 PE=2 SV=1
10	101	A0A223PK22|A0A223PK22_9SAUR	50.18	5	5		1	0	2	Oxidation (M)	29388	Cysteine rich secretory protein (Fragment) OS=Daboia russelii OX=8707 PE=2 SV=1
10	111	sp|B0VXV6|CRVP_SISCA	37.17	5	5		1	0	1		26542	Cysteine-rich venom protein 2 OS=Sistrurus catenatus edwardsii OX=8762 PE=2 SV=1
10	112	sp|F8S0Y4|CRVP_CROAD	37.17	5	5		1	0	1		26629	Cysteine-rich secretory protein OS=Crotalus adamanteus OX=8729 PE=1 SV=1
10	113	A0A0F7Z2U7|A0A0F7Z2U7_CROAD	37.17	5	5		1	0	1		26629	Cadam10_CRISP-1 OS=Crotalus adamanteus OX=8729 PE=2 SV=1
10	114	A0A194ASQ9|A0A194ASQ9_SISTE	37.17	5	5		1	0	1		26730	Cysteine-rich secretory protein 1d OS=Sistrurus tergeminus OX=8757 PE=3 SV=1
10	115	A0A194ATN9|A0A194ATN9_SISTE	37.17	5	5		1	0	1		26758	Cysteine-rich secretory protein 1a OS=Sistrurus tergeminus OX=8757 PE=3 SV=1
12	24	A0A1I9KNM0|A0A1I9KNM0_VIPAA	108.13	25	25	0	5	1	9	Carbamidomethylation; Oxidation (M); Deamidation (NQ)	26517	Cysteine-rich secretory protein CRISP-1 OS=Vipera ammodytes ammodytes OX=8705 PE=2 SV=1
13	16	sp|P14615|PA2N3_BUNFA	106.66	52	52	1920000	4	2	5	Carbamidomethylation; Oxidation (M)	13425	Neutral phospholipase A2 3 OS=Bungarus fasciatus OX=8613 PE=1 SV=2
15	42	sp|P29601|PA2HA_BUNFA	99.69	34	34	1370000	3	1	4	Carbamidomethylation	13103	Acidic phospholipase A2 homolog OS=Bungarus fasciatus OX=8613 PE=1 SV=1
18	96	sp|P80966|PA2A1_OPHHA	77.76	13	13	1300000	2	1	3	Carbamidomethylation	16444	Acidic phospholipase A2 1 OS=Ophiophagus hannah OX=8665 PE=1 SV=2
19	84	A0A2D4K8T2|A0A2D4K8T2_9SAUR	61	14	14	176000	2	1	2	Carbamidomethylation	15369	Uncharacterized protein (Fragment) OS=Micrurus paraensis OX=1970185 PE=3 SV=1
19	85	U3EPH0|U3EPH0_MICFL	61	13	13	176000	2	1	2	Carbamidomethylation	16274	Phospholipase A2 1 OS=Micrurus fulvius OX=8637 PE=2 SV=1
19	86	A0A194AT75|A0A194AT75_9SAUR	61	13	13	176000	2	1	2	Carbamidomethylation	16274	Phospholipase A2 1 OS=Micrurus tener OX=1114301 PE=3 SV=1
16	75	sp|Q6YNQ0|PA2A3_BUNCA	59.16	26	26	344000	2	1	3	Carbamidomethylation; Oxidation (M); Deamidation (NQ)	15092	Acidic phospholipase A2 beta-bungarotoxin A3 chain (Fragment) OS=Bungarus candidus OX=92438 PE=2 SV=1
16	76	sp|P00619|PA2A3_BUNMU	59.16	24	24	344000	2	1	3	Carbamidomethylation; Oxidation (M); Deamidation (NQ)	16218	Acidic phospholipase A2 beta-bungarotoxin A3 chain OS=Bungarus multicinctus OX=8616 PE=1 SV=2
16	118	Q6TAR5|Q6TAR5_BUNCA	33.17	10	10		1	0	1	Oxidation (M)	10967	Beta-neurotoxin (Fragment) OS=Bungarus candidus OX=92438 PE=3 SV=1
16	119	Q6TAR7|Q6TAR7_BUNCA	33.17	7	7		1	0	1	Oxidation (M)	14880	Beta-neurotoxin (Fragment) OS=Bungarus candidus OX=92438 PE=2 SV=1
16	124	sp|P84474|PA2BU_BUNCA	33.17	71	71		1	0	1	Oxidation (M)	1755	Basic phospholipase A2 T2 A chain (Fragment) OS=Bungarus candidus OX=92438 PE=1 SV=1
23	77	sp|Q90WI7|LECM2_BUNFA	58.65	17	17	29200	2	2	2	Carbamidomethylation	18254	C-type lectin BfL-2 OS=Bungarus fasciatus OX=8613 PE=2 SV=1
17	89	sp|F8QN52|PA2A1_VIPRE	56.05	12	12	1280000	1	1	3	Carbamidomethylation; Oxidation (M)	15384	Acidic phospholipase A2 PL1 OS=Vipera renardi OX=927686 PE=2 SV=1
31	90	sp|P86368|PA2B3_DABRR	55.08	15	15	181000	1	1	1	Carbamidomethylation	13687	Basic phospholipase A2 3 OS=Daboia russelii OX=31159 PE=1 SV=1
31	91	D0VX11|D0VX11_9SAUR	55.08	15	15	181000	1	1	1	Carbamidomethylation	13611	Phospholipase A2 VRV-PL-VIIIa OS=Daboia russellii pulchella OX=97228 PE=1 SV=1
31	92	sp|P59071|PA2B8_DABRR	55.08	15	15	181000	1	1	1	Carbamidomethylation	13611	Basic phospholipase A2 VRV-PL-VIIIa OS=Daboia russelii OX=31159 PE=1 SV=1
31	93	sp|A8CG84|PA2BS_DABSI	55.08	13	13	181000	1	1	1	Carbamidomethylation	15381	Basic phospholipase A2 DsM-S1 OS=Daboia siamensis OX=343250 PE=2 SV=1
31	94	B3RFI8|B3RFI8_9SAUR	55.08	13	13	181000	1	1	1	Carbamidomethylation	15353	Phospholipase A2 OS=Daboia russellii limitis OX=338883 PE=2 SV=1
31	95	sp|F8QN54|PA2B_VIPRE	55.08	13	13	181000	1	1	1	Carbamidomethylation	15636	Basic phospholipase A2 vurtoxin OS=Vipera renardi OX=927686 PE=1 SV=1
25	97	F2Q6G2|F2Q6G2_BUNCA	53.84	8	8	442000	1	1	2	Carbamidomethylation; Oxidation (M)	26458	Cysteine-rich seceretory protein Bc-CRPb OS=Bungarus candidus OX=92438 PE=2 SV=1
25	98	F2Q6G3|F2Q6G3_BUNCA	53.84	8	8	442000	1	1	2	Carbamidomethylation; Oxidation (M)	26443	Cysteine-rich seceretory protein Bc-CRPa OS=Bungarus candidus OX=92438 PE=2 SV=1
20	30	sp|Q8AY48|PA2B1_BUNCA	51.83	22	22		2	0	2	Carbamidomethylation; Oxidation (M)	15257	Basic phospholipase A2 beta-bungarotoxin A1 chain (Fragment) OS=Bungarus candidus OX=92438 PE=2 SV=1
20	31	Q8AXW0|Q8AXW0_BUNMU	51.83	21	21		2	0	2	Carbamidomethylation; Oxidation (M)	16108	Beta-bungarotoxin A chain OS=Bungarus multicinctus OX=8616 GN=a chain PE=2 SV=1
20	32	Q546H3|Q546H3_BUNMU	51.83	21	21		2	0	2	Carbamidomethylation; Oxidation (M)	16296	Beta-bungarotoxin A2 chain OS=Bungarus multicinctus OX=8616 GN=a2 chain PE=3 SV=1
20	33	sp|P00618|PA2B2_BUNMU	51.83	21	21		2	0	2	Carbamidomethylation; Oxidation (M)	16296	Basic phospholipase A2 beta-bungarotoxin A2 chain OS=Bungarus multicinctus OX=8616 PE=1 SV=2
20	34	Q8AXW2|Q8AXW2_BUNMU	51.83	21	21		2	0	2	Carbamidomethylation; Oxidation (M)	16122	Beta-bungarotoxin A8 chain OS=Bungarus multicinctus OX=8616 GN=a8 chain PE=3 SV=1
20	35	Q546H2|Q546H2_BUNMU	51.83	20	20		2	0	2	Carbamidomethylation; Oxidation (M)	16220	Beta-bungarotoxin A1a chain OS=Bungarus multicinctus OX=8616 GN=a1a chain PE=3 SV=1
20	36	sp|P00617|PA2B1_BUNMU	51.83	20	20		2	0	2	Carbamidomethylation; Oxidation (M)	16220	Basic phospholipase A2 beta-bungarotoxin A1 chain OS=Bungarus multicinctus OX=8616 PE=1 SV=2
20	37	Q8AXW1|Q8AXW1_BUNMU	51.83	20	20		2	0	2	Carbamidomethylation; Oxidation (M)	16236	Beta-bungarotoxin A1 chain OS=Bungarus multicinctus OX=8616 GN=a1 chain PE=3 SV=1
20	78	sp|Q9PTA7|PA2B_BUNMU	51.83	23	23		2	0	2	Carbamidomethylation; Oxidation (M)	14938	Basic phospholipase A2 beta-bungarotoxin A-AL2 chain (Fragment) OS=Bungarus multicinctus OX=8616 PE=3 SV=1
20	79	sp|Q9PU97|PA2B7_BUNMU	51.83	22	22		2	0	2	Carbamidomethylation; Oxidation (M)	15120	Basic phospholipase A2 beta-bungarotoxin A7 chain (Fragment) OS=Bungarus multicinctus OX=8616 PE=2 SV=1
20	80	sp|Q6YIJ3|PA2A_BUNCA	51.83	22	22		2	0	2	Carbamidomethylation; Oxidation (M)	15063	Acidic phospholipase A2 beta-bungarotoxin A chain (Fragment) OS=Bungarus candidus OX=92438 PE=2 SV=1
20	81	sp|Q9PTA1|PA2BA_BUNMU	51.83	22	22		2	0	2	Carbamidomethylation; Oxidation (M)	15258	Basic phospholipase A2 beta-bungarotoxin A-AL1 chain (Fragment) OS=Bungarus multicinctus OX=8616 PE=1 SV=1
20	87	sp|P59018|PA2B5_BUNMU	35.24	15	15		1	0	1	Carbamidomethylation	15265	Basic phospholipase A2 beta-bungarotoxin A5 chain (Fragment) OS=Bungarus multicinctus OX=8616 PE=1 SV=1
20	120	sp|Q75S51|PA2B4_BUNCA	35.24	14	14		1	0	1	Carbamidomethylation	16355	Basic phospholipase A2 beta-bungarotoxin A4 chain OS=Bungarus candidus OX=92438 PE=2 SV=1
21	39	sp|Q7T1R1|PA2B2_BUNFL	50.97	18	18		2	0	2	Carbamidomethylation	16208	Basic phospholipase A2 beta-bungarotoxin A2 chain OS=Bungarus flaviceps flaviceps OX=8615 PE=1 SV=1
21	40	D5J9R9|D5J9R9_9SAUR	50.97	18	18		2	0	2	Carbamidomethylation	16208	Beta-bungarotoxin a chain isoform 3 OS=Bungarus flaviceps OX=8614 PE=2 SV=1
32	102	A0A2D4L152|A0A2D4L152_9SAUR	48.35	10	10	165000	1	1	1	Carbamidomethylation	16205	Uncharacterized protein (Fragment) OS=Micrurus paraensis OX=1970185 PE=4 SV=1
32	103	A0A2D4L0V7|A0A2D4L0V7_9SAUR	48.35	6	6	165000	1	1	1	Carbamidomethylation	26940	Uncharacterized protein (Fragment) OS=Micrurus paraensis OX=1970185 PE=4 SV=1
32	104	A0A2D4LBN1|A0A2D4LBN1_9SAUR	48.35	5	5	165000	1	1	1	Carbamidomethylation	30012	Uncharacterized protein (Fragment) OS=Micrurus spixii OX=129469 PE=4 SV=1
32	105	A0A2D4LBL3|A0A2D4LBL3_9SAUR	48.35	4	4	165000	1	1	1	Carbamidomethylation	39264	Uncharacterized protein (Fragment) OS=Micrurus spixii OX=129469 PE=4 SV=1
32	106	A0A2D4PZB5|A0A2D4PZB5_MICSU	48.35	2	2	165000	1	1	1	Carbamidomethylation	96178	Uncharacterized protein OS=Micrurus surinamensis OX=129470 PE=4 SV=1
32	107	V8NSK8|V8NSK8_OPHHA	48.35	2	2	165000	1	1	1	Carbamidomethylation	105984	Golgi apparatus protein 1 (Fragment) OS=Ophiophagus hannah OX=8665 GN=GLG1 PE=4 SV=1
32	108	A0A2D4PXP4|A0A2D4PXP4_MICSU	48.35	1	1	165000	1	1	1	Carbamidomethylation	122130	Uncharacterized protein (Fragment) OS=Micrurus surinamensis OX=129470 PE=4 SV=1
24	83	sp|Q8QFW3|PA2B2_BUNCE	47.15	13	13		2	0	2	Oxidation (M)	16120	Basic phospholipase A2 beta-bungarotoxin A2 chain OS=Bungarus caeruleus OX=132961 PE=2 SV=1
33	116	sp|P59067|PA2SA_AUSSU	36.94	31	31	114000	1	1	1	Carbamidomethylation	7035	Phospholipase A2 superbin a (Fragment) OS=Austrelaps superbus OX=29156 PE=1 SV=1
14	121	A6MFM8|A6MFM8_CRYNI	35.06	10	10	3190000	1	1	5		15940	PLA2-3 OS=Cryptophis nigrescens OX=292442 PE=2 SV=1
29	117	L8B360|L8B360_PROEL	31.33	21	21	0	1	1	1	Carbamidomethylation; Deamidation (NQ)	16546	Pancreatic phospholipase A2 OS=Protobothrops elegans OX=88086 GN=pancreatic PLA2 PE=3 SV=1
29	125	M5B1W7|M5B1W7_PROFL	31.33	21	21	0	1	1	1	Carbamidomethylation; Deamidation (NQ)	16576	Phospholipase A2 OS=Protobothrops flavoviridis OX=88087 GN=PfPancPLA2 PE=3 SV=1
27	131	A0A2H6NJR7|A0A2H6NJR7_MICLE	30.14	3	3	0	1	1	1		29462	Uncharacterized protein (Fragment) OS=Micrurus lemniscatus carvalhoi OX=129465 PE=4 SV=1
27	133	A0A2D4HX65|A0A2D4HX65_MICLE	30.14	3	3	0	1	1	1		39782	Uncharacterized protein (Fragment) OS=Micrurus lemniscatus lemniscatus OX=129467 PE=4 SV=1
27	134	A0A2D4GCJ9|A0A2D4GCJ9_MICCO	30.14	2	2	0	1	1	1		40469	Uncharacterized protein (Fragment) OS=Micrurus corallinus OX=54390 PE=4 SV=1
27	135	A0A2D4KHI3|A0A2D4KHI3_9SAUR	30.14	2	2	0	1	1	1		41385	Uncharacterized protein (Fragment) OS=Micrurus paraensis OX=1970185 PE=4 SV=1
27	136	A0A2D4NPC4|A0A2D4NPC4_MICSU	30.14	2	2	0	1	1	1		49197	Uncharacterized protein (Fragment) OS=Micrurus surinamensis OX=129470 PE=4 SV=1
27	138	V8P1W7|V8P1W7_OPHHA	30.14	1	1	0	1	1	1		67657	Set1/Ash2 histone methyltransferase complex subunit ASH2 OS=Ophiophagus hannah OX=8665 GN=ASH2L PE=4 SV=1
36	137	A0A194APT7|A0A194APT7_9SAUR	29.98	14	14	307000	1	1	1	Carbamidomethylation	15757	Phospholipase A2 1k OS=Agkistrodon piscivorus OX=8715 PE=3 SV=1
28	139	A0A0H3U239|A0A0H3U239_9SAUR	29.39	14	14	542000	1	1	1	Carbamidomethylation	15816	Phospholipase A2 OS=Trimeresurus erythrurus OX=109779 PE=3 SV=1
37	140	A0A2D4JUR3|A0A2D4JUR3_9SAUR	28.1	4	4	197000	1	1	1	Carbamidomethylation	22554	Uncharacterized protein (Fragment) OS=Micrurus paraensis OX=1970185 PE=3 SV=1
37	150	A0A2D4IFS3|A0A2D4IFS3_MICLE	28.1	1	1	197000	1	1	1	Carbamidomethylation	62302	Choline dehydrogenase (Fragment) OS=Micrurus lemniscatus lemniscatus OX=129467 PE=3 SV=1
37	151	V8NZJ3|V8NZJ3_OPHHA	28.1	1	1	197000	1	1	1	Carbamidomethylation	71477	BetA (Fragment) OS=Ophiophagus hannah OX=8665 GN=betA PE=3 SV=1
38	152	sp|A8QL49|VM3_BUNMU	27.38	4	4	37500	1	1	1		68988	Zinc metalloproteinase-disintegrin-like BmMP OS=Bungarus multicinctus OX=8616 PE=1 SV=1
39	153	J3SCU1|J3SCU1_CROAD	27.12	1	1	29500	1	1	1		151619	Nuclear pore complex protein Nup153 OS=Crotalus adamanteus OX=8729 PE=2 SV=1
40	159	V8PFP8|V8PFP8_OPHHA	25.93	2	2	570000	1	1	1		49036	Opsin-5 (Fragment) OS=Ophiophagus hannah OX=8665 GN=Opn5 PE=3 SV=1
464	156	sp|A2CKF6|3NO28_BUNFA	25.91	10	10	97700	1	1	1	Carbamidomethylation	9722	Neurotoxin 3FTx-8a OS=Bungarus fasciatus OX=8613 PE=1 SV=1
