# Supplementary material for: Phospholipase A2 from krait Bungarus fasciatus venom induces human cancer cell death in vitro
Source: PeerJ. 2019 Dec 3;7:e8055. doi: 10.7717/peerj.8055 (PMC6896944; doi:10.7717/peerj.8055)
Supplement: Supplemental Information 5 [file peerj-07-8055-s005.xlsx]

## Sheet: 24h
	Control			BF1_VS			BF2_VS			BF3_VS			BF4_VS			BF5_VS			BF_VS
1	1.412	1.387	1.315	1.538	1.459	1.419	1.44	1.328	1.363	1.386	1.395	1.362	1.386	1.395	1.382	1.324	1.418	1.341	1.364	1.327	1.411
10				1.499	1.431	1.378	1.375	1.369	1.412	1.221	1.273	1.213	1.371	1.373	1.413	1.364	1.352	1.402	1.231	1.262	1.174
50				1.362	1.489	1.427	1.416	1.39	1.443	1.116	1.172	1.064	1.433	1.358	1.402	1.406	1.339	1.363	1.127	1.064	1.122
100				1.393	1.345	1.405	1.418	1.446	1.452	0.995	0.942	1.067	1.484	1.365	1.401	1.409	1.356	1.422	0.938	1.006	0.944
	Control
	1.37133
	Control			BF1_VS			BF2_VS			BF3_VS			BF4_VS			BF5_VS			BF_VS
1	102.965	101.142	95.8921	112.154	106.393	103.476	105.007	96.8401	99.3923	101.07	101.726	99.3194	101.07	101.726	100.778	96.5484	103.403	97.788	99.4652	96.7671	102.893
10	102.965	101.142	95.8921	109.31	104.351	100.486	100.267	99.8298	102.965	89.0374	92.8294	88.4541	99.9757	100.122	103.038	99.4652	98.5902	102.236	89.7667	92.0272	85.6101
50	102.965	101.142	95.8921	99.3194	108.58	104.059	103.257	101.361	105.226	81.3807	85.4643	77.5887	104.497	99.0277	102.236	102.528	97.6422	99.3923	82.1828	77.5887	81.8182
100	102.965	101.142	95.8921	101.58	98.0797	102.455	103.403	105.445	105.882	72.5571	68.6923	77.8075	108.216	99.5382	102.163	102.747	98.8819	103.695	68.4006	73.3593	68.8381
	Control			BF1_VS			BF2_VS			BF3_VS			BF4_VS			BF5_VS			BF_VS
	average	stdev		average	stdev		average	stdev		average	stdev		average	stdev		average	stdev		average	stdev
1	100	3.67249		107.341	4.41583		100.413	4.17823		100.705	1.24395		101.191	0.485537		99.2465	3.65264		99.7083	3.06994
10				104.716	4.42305		101.021	1.69821		90.107	2.37565		101.045	1.7277		100.097	1.90343		89.1347	3.2549
50				103.986	4.63096		103.281	1.93254		81.4779	3.93867		101.92	2.74822		99.8542	2.4754		80.5299	2.55365
100				100.705	2.31519		104.91	1.32335		73.019	4.57512		103.306	4.45022		101.774	2.54948		70.1993	2.74532
			Control	BF1_VS	BF2_VS	BF3_VS	BF4_VS	BF5_VS	BF_VS		10 ug/mL
		1	102.965	112.154	105.007	101.07	101.07	96.5484	99.4652		Anova: Single Factor
			101.142	106.393	96.8401	101.726	101.726	103.403	96.7671																									Total
			95.8921	103.476	99.3923	99.3194	100.778	97.788	102.893		SUMMARY
		10	102.965	109.31	100.267	89.0374	99.9757	99.4652	89.7667		Groups	Count	Sum	Average	Variance																		1	21
			101.142	104.351	99.8298	92.8294	100.122	98.5902	92.0272		Column 1	3	300	100	13.4872																		102.893	2125.81
			95.8921	100.486	102.965	88.4541	103.038	102.236	85.6101		Column 2	3	314.147	104.716	19.5634																		102.893	101.229
		50	102.965	99.3194	103.257	81.3807	104.497	102.528	82.1828		Column 3	3	303.063	101.021	2.8839																		#DIV/0!	14.4067
			101.142	108.58	101.361	85.4643	99.0277	97.6422	77.5887		Column 4	3	270.321	90.107	5.64372
			95.8921	104.059	105.226	77.5887	102.236	99.3923	81.8182		Column 5	3	303.136	101.045	2.98493
		100	102.965	101.58	103.403	72.5571	108.216	102.747	68.4006		Column 6	3	300.292	100.097	3.62304																		1	21
			101.142	98.0797	105.445	68.6923	99.5382	98.8819	73.3593		Column 7	3	267.404	89.1347	10.5944																		85.6101	2058.36
			95.8921	102.455	105.882	77.8075	102.163	103.695	68.8381																								85.6101	98.0172
																																	#DIV/0!	37.7964
t-Test: Two-Sample Assuming Equal Variances					t-Test: Two-Sample Assuming Equal Variances						ANOVA
											Source of Variation	SS	df	MS	F	P-value	F crit
	Variable 1	Variable 2				Variable 1	Variable 2				Between Groups	638.368	6	106.395	12.6702	5.91425e-05	2.84773																1	21
Mean	100	90.107			Mean	100	89.1347				Within Groups	117.561	14	8.39722																			81.8182	2013.15
Variance	13.4872	5.64372			Variance	13.4872	10.5944																										81.8182	95.8643
Observations	3	3			Observations	3	3				Total	755.929	20																				#DIV/0!	102.357
Pooled Variance	9.56544				Pooled Variance	12.0408
Hypothesized Mean Difference	0				Hypothesized Mean Difference	0					50 ug/mL
df	4				df	4					Anova: Single Factor																						1	21
t Stat	3.91763				t Stat	3.83497																											68.8381	1961.74
P(T<=t) one-tail	0.0086411				P(T<=t) one-tail	0.00926956					SUMMARY																						68.8381	93.4162
t Critical one-tail	2.13185				t Critical one-tail	2.13185					Groups	Count	Sum	Average	Variance																		#DIV/0!	210.234
P(T<=t) two-tail	0.0172822				P(T<=t) two-tail	0.0185391					Column 1	3	300	100	13.4872
t Critical two-tail	2.77645				t Critical two-tail	2.77645					Column 2	3	311.959	103.986	21.4458
											Column 3	3	309.844	103.281	3.73471																		4
t-Test: Two-Sample Assuming Equal Variances					t-Test: Two-Sample Assuming Equal Variances						Column 4	3	244.434	81.4779	15.5131																		339.159
											Column 5	3	305.761	101.92	7.55273																		84.7897
	Variable 1	Variable 2				Variable 1	Variable 2				Column 6	3	299.562	99.8542	6.12762																		197.223
Mean	100	81.4779			Mean	100	80.5299				Column 7	3	241.59	80.5299	6.52112
Variance	13.4872	15.5131			Variance	13.4872	6.52112
Observations	3	3			Observations	3	3
Pooled Variance	14.5002				Pooled Variance	10.0041					ANOVA
Hypothesized Mean Difference	0				Hypothesized Mean Difference	0					Source of Variation	SS	df	MS	F	P-value	F crit
df	4				df	4					Between Groups	1898.38	6	316.397	29.7756	3.37852e-07	2.84773
t Stat	5.95731				t Stat	7.53918					Within Groups	148.765	14	10.626
P(T<=t) one-tail	0.00199272				P(T<=t) one-tail	0.000828952
t Critical one-tail	2.13185				t Critical one-tail	2.13185					Total	2047.15	20
P(T<=t) two-tail	0.00398543				P(T<=t) two-tail	0.0016579
t Critical two-tail	2.77645				t Critical two-tail	2.77645					100 ug/mL
											Anova: Single Factor
t-Test: Two-Sample Assuming Equal Variances					t-Test: Two-Sample Assuming Equal Variances
											SUMMARY
	Variable 1	Variable 2				Variable 1	Variable 2				Groups	Count	Sum	Average	Variance
Mean	100	73.019			Mean	100	70.1993				Column 1	3	300	100	13.4872
Variance	13.4872	20.9318			Variance	13.4872	7.53678				Column 2	3	302.115	100.705	5.36012
Observations	3	3			Observations	3	3				Column 3	3	314.73	104.91	1.75126
Pooled Variance	17.2095				Pooled Variance	10.512					Column 4	3	219.057	73.019	20.9318
Hypothesized Mean Difference	0				Hypothesized Mean Difference	0					Column 5	3	309.917	103.306	19.8044
df	4				df	4					Column 6	3	305.323	101.774	6.49985
t Stat	7.96564				t Stat	11.2572					Column 7	3	210.598	70.1993	7.53678
P(T<=t) one-tail	0.000672872				P(T<=t) one-tail	0.000177375
t Critical one-tail	2.13185				t Critical one-tail	2.13185
P(T<=t) two-tail	0.00134574				P(T<=t) two-tail	0.000354751					ANOVA
t Critical two-tail	2.77645				t Critical two-tail	2.77645					Source of Variation	SS	df	MS	F	P-value	F crit
											Between Groups	4053.95	6	675.658	62.7507	2.57124e-09	2.84773
											Within Groups	150.743	14	10.7673
											Total	4204.69	20

## Sheet: 48h
	Control			BF1_VS			BF2_VS			BF3_VS			BF4_VS			BF5_VS			BF_VS
1	1.546	1.514	1.497	1.587	1.615	1.562	1.566	1.545	1.529	1.515	1.499	1.502	1.544	1.523	1.519	1.541	1.524	1.509	1.504	1.515	1.537
10				1.569	1.575	1.537	1.521	1.546	1.505	1.314	1.275	1.303	1.563	1.497	1.501	1.524	1.507	1.515	1.297	1.317	1.322
50				1.532	1.611	1.577	1.542	1.511	1.532	1.112	1.114	1.045	1.505	1.528	1.512	1.547	1.511	1.543	1.102	1.142	1.118
100				1.549	1.574	1.565	1.541	1.505	1.601	0.895	0.834	0.821	1.527	1.535	1.505	1.497	1.524	1.541	0.795	0.812	0.841
	Control
	1.519
	Control			BF1_VS			BF2_VS			BF3_VS			BF4_VS			BF5_VS			BF_VS
1	101.777	99.6708	98.5517	104.477	106.32	102.831	103.094	101.712	100.658	99.7367	98.6833	98.8808	101.646	100.263	100	101.448	100.329	99.3417	99.0125	99.7367	101.185
10	101.777	99.6708	98.5517	103.292	103.687	101.185	100.132	101.777	99.0783	86.5043	83.9368	85.7801	102.897	98.5517	98.815	100.329	99.21	99.7367	85.3851	86.7018	87.0309
50	101.777	99.6708	98.5517	100.856	106.057	103.818	101.514	99.4733	100.856	73.2061	73.3377	68.7953	99.0783	100.592	99.5392	101.843	99.4733	101.58	72.5477	75.181	73.6011
100	101.777	99.6708	98.5517	101.975	103.621	103.028	101.448	99.0783	105.398	58.9203	54.9045	54.0487	100.527	101.053	99.0783	98.5517	100.329	101.448	52.3371	53.4562	55.3654
	Control			BF1_VS			BF2_VS			BF3_VS			BF4_VS			BF5_VS			BF_VS
	average	stdev		average	stdev		average	stdev		average	stdev		average	stdev		average	stdev		average	stdev
1	100	1.6379		104.542	1.7455		101.821	1.22161		99.1003	0.559901		100.636	0.884057		100.373	1.05401		99.9781	1.10617
10				102.721	1.34488		100.329	1.36037		85.4071	1.32377		100.088	2.43611		99.7586	0.559901		86.3726	0.870886
50				103.577	2.60878		100.614	1.0416		71.7797	2.58542		99.7367	0.776157		100.966	1.29898		73.7766	1.3254
100				102.875	0.833593		101.975	3.19272		55.9579	2.60102		100.219	1.02271		100.11	1.46074		53.7196	1.53123
											10 ug/mL
			Control	BF1_VS	BF2_VS	BF3_VS	BF4_VS	BF5_VS	BF_VS		Anova: Single Factor
		1	101.777	104.477	103.094	99.7367	101.646	101.448	99.0125
			99.6708	106.32	101.712	98.6833	100.263	100.329	99.7367		SUMMARY
			98.5517	102.831	100.658	98.8808	100	99.3417	101.185		Groups	Count	Sum	Average	Variance
		10	101.777	103.292	100.132	86.5043	102.897	100.329	85.3851		Column 1	3	300	100	2.68272
			99.6708	103.687	101.777	83.9368	98.5517	99.21	86.7018		Column 2	3	308.163	102.721	1.8087
			98.5517	101.185	99.0783	85.7801	98.815	99.7367	87.0309		Column 3	3	300.987	100.329	1.8506
		50	101.777	100.856	101.514	73.2061	99.0783	101.843	72.5477		Column 4	3	256.221	85.4071	1.75236
			99.6708	106.057	99.4733	73.3377	100.592	99.4733	75.181		Column 5	3	300.263	100.088	5.93463
			98.5517	103.818	100.856	68.7953	99.5392	101.58	73.6011		Column 6	3	299.276	99.7586	0.313489
		100	101.777	101.975	101.448	58.9203	100.527	98.5517	52.3371		Column 7	3	259.118	86.3726	0.758442
			99.6708	103.621	99.0783	54.9045	101.053	100.329	53.4562
			98.5517	103.028	105.398	54.0487	99.0783	101.448	55.3654
											ANOVA
t-Test: Two-Sample Assuming Equal Variances					t-Test: Two-Sample Assuming Equal Variances						Source of Variation	SS	df	MS	F	P-value	F crit
											Between Groups	943.876	6	157.313	72.9218	9.38643e-10	2.84773
	Variable 1	Variable 2				Variable 1	Variable 2				Within Groups	30.2019	14	2.15728
Mean	100	85.4071			Mean	100	86.3726
Variance	2.68272	1.75236			Variance	2.68272	0.758442				Total	974.078	20
Observations	3	3			Observations	3	3
Pooled Variance	2.21754				Pooled Variance	1.72058					50 ug/mL
Hypothesized Mean Difference	0				Hypothesized Mean Difference	0					Anova: Single Factor
df	4				df	4
t Stat	12.002				t Stat	12.7239					SUMMARY
P(T<=t) one-tail	0.000138126				P(T<=t) one-tail	0.000109891					Groups	Count	Sum	Average	Variance
t Critical one-tail	2.13185				t Critical one-tail	2.13185					Column 1	3	300	100	2.68272
P(T<=t) two-tail	0.000276251				P(T<=t) two-tail	0.000219783					Column 2	3	310.731	103.577	6.80575
t Critical two-tail	2.77645				t Critical two-tail	2.77645					Column 3	3	301.843	100.614	1.08493
											Column 4	3	215.339	71.7797	6.6844
t-Test: Two-Sample Assuming Equal Variances					t-Test: Two-Sample Assuming Equal Variances						Column 5	3	299.21	99.7367	0.60242
											Column 6	3	302.897	100.966	1.68735
	Variable 1	Variable 2				Variable 1	Variable 2				Column 7	3	221.33	73.7766	1.7567
Mean	100	71.7797			Mean	100	73.7766
Variance	2.68272	6.6844			Variance	2.68272	1.7567
Observations	3	3			Observations	3	3				ANOVA
Pooled Variance	4.68356				Pooled Variance	2.21971					Source of Variation	SS	df	MS	F	P-value	F crit
Hypothesized Mean Difference	0				Hypothesized Mean Difference	0					Between Groups	3442.44	6	573.741	188.515	1.43871e-12	2.84773
df	4				df	4					Within Groups	42.6086	14	3.04347
t Stat	15.9705				t Stat	21.5569
P(T<=t) one-tail	4.49341e-05				P(T<=t) one-tail	1.36952e-05					Total	3485.05	20
t Critical one-tail	2.13185				t Critical one-tail	2.13185
P(T<=t) two-tail	8.98683e-05				P(T<=t) two-tail	2.73905e-05					100 ug/mL
t Critical two-tail	2.77645				t Critical two-tail	2.77645					Anova: Single Factor
t-Test: Two-Sample Assuming Equal Variances					t-Test: Two-Sample Assuming Equal Variances						SUMMARY
											Groups	Count	Sum	Average	Variance
	Variable 1	Variable 2				Variable 1	Variable 2				Column 1	3	300	100	2.68272
Mean	100	55.9579			Mean	100	53.7196				Column 2	3	308.624	102.875	0.694878
Variance	2.68272	6.7653			Variance	2.68272	2.34467				Column 3	3	305.925	101.975	10.1935
Observations	3	3			Observations	3	3				Column 4	3	167.874	55.9579	6.7653
Pooled Variance	4.72401				Pooled Variance	2.51369					Column 5	3	300.658	100.219	1.04593
Hypothesized Mean Difference	0				Hypothesized Mean Difference	0					Column 6	3	300.329	100.11	2.13375
df	4				df	4					Column 7	3	161.159	53.7196	2.34467
t Stat	24.8175				t Stat	35.7509
P(T<=t) one-tail	7.8235e-06				P(T<=t) one-tail	1.82689e-06
t Critical one-tail	2.13185				t Critical one-tail	2.13185					ANOVA
P(T<=t) two-tail	1.5647e-05				P(T<=t) two-tail	3.65377e-06					Source of Variation	SS	df	MS	F	P-value	F crit
t Critical two-tail	2.77645				t Critical two-tail	2.77645					Between Groups	9174.53	6	1529.09	413.895	6.20222e-15	2.84773
											Within Groups	51.7214	14	3.69439
											Total	9226.25	20

## Sheet: 72h
	Control			BF1_VS			BF2_VS			BF3_VS			BF4_VS			BF5_VS			BF_VS
1	1.415	1.402	1.467	1.436	1.424	1.475	1.423	1.417	1.471	1.401	1.395	1.382	1.428	1.439	1.475	1.475	1.425	1.431	1.412	1.392	1.424
10				1.41	1.455	1.431	1.436	1.425	1.448	1.048	1.023	0.981	1.432	1.447	1.401	1.429	1.464	1.419	0.974	1.041	0.967
50				1.471	1.429	1.44	1.432	1.447	1.415	0.692	0.714	0.735	1.464	1.427	1.419	1.452	1.475	1.434	0.632	0.647	0.699
100				1.421	1.462	1.415	1.463	1.427	1.404	0.275	0.214	0.231	1.434	1.451	1.44	1.422	1.447	1.438	0.195	0.217	0.184
	Control
	1.428
	Control			BF1_VS			BF2_VS			BF3_VS			BF4_VS			BF5_VS			BF_VS
1	99.0896	98.1793	102.731	100.56	99.7199	103.291	99.6499	99.2297	103.011	98.1092	97.6891	96.7787	100	100.77	103.291	103.291	99.7899	100.21	98.8796	97.479	99.7199
10	99.0896	98.1793	102.731	98.7395	101.891	100.21	100.56	99.7899	101.401	73.3894	71.6387	68.6975	100.28	101.331	98.1092	100.07	102.521	99.3697	68.2073	72.8992	67.7171
50	99.0896	98.1793	102.731	103.011	100.07	100.84	100.28	101.331	99.0896	48.4594	50	51.4706	102.521	99.93	99.3697	101.681	103.291	100.42	44.2577	45.3081	48.9496
100	99.0896	98.1793	102.731	99.5098	102.381	99.0896	102.451	99.93	98.3193	19.2577	14.986	16.1765	100.42	101.611	100.84	99.5798	101.331	100.7	13.6555	15.1961	12.8852
	Control			BF1_VS			BF2_VS			BF3_VS			BF4_VS			BF5_VS			BF_VS
	average	stdev		average	stdev		average	stdev		average	stdev		average	stdev		average	stdev		average	stdev
1	100	2.4086		101.19	1.86727		100.63	2.07264		97.5257	0.680149		101.354	1.72151		101.097	1.91182		98.6928	1.13206
10				100.28	1.5768		100.584	0.805576		71.2418	2.37098		99.9066	1.6428		100.654	1.6547		69.6078	2.86088
50				101.307	1.52515		100.233	1.12118		49.9767	1.50574		100.607	1.68116		101.797	1.43913		46.1718	2.46229
100				100.327	1.79131		100.233	2.08247		16.8067	2.20449		100.957	0.603759		100.537	0.886714		13.9122	1.17667
			Control	BF1_VS	BF2_VS	BF3_VS	BF4_VS	BF5_VS	BF_VS		10 ug/mL
		1	99.0896	100.56	99.6499	98.1092	100	103.291	98.8796		Anova: Single Factor
			98.1793	99.7199	99.2297	97.6891	100.77	99.7899	97.479
			102.731	103.291	103.011	96.7787	103.291	100.21	99.7199		SUMMARY
		10	99.0896	98.7395	100.56	73.3894	100.28	100.07	68.2073		Groups	Count	Sum	Average	Variance
			98.1793	101.891	99.7899	71.6387	101.331	102.521	72.8992		Column 1	3	300	100	5.80134
			102.731	100.21	101.401	68.6975	98.1092	99.3697	67.7171		Column 2	3	300.84	100.28	2.48629
		50	99.0896	103.011	100.28	48.4594	102.521	101.681	44.2577		Column 3	3	301.751	100.584	0.648952
			98.1793	100.07	101.331	50	99.93	103.291	45.3081		Column 4	3	213.725	71.2418	5.62153
			102.731	100.84	99.0896	51.4706	99.3697	100.42	48.9496		Column 5	3	299.72	99.9066	2.69879
		100	99.0896	99.5098	102.451	19.2577	100.42	99.5798	13.6555		Column 6	3	301.961	100.654	2.73802
			98.1793	102.381	99.93	14.986	101.611	101.331	15.1961		Column 7	3	208.824	69.6078	8.18465
			102.731	99.0896	98.3193	16.1765	100.84	100.7	12.8852
t-Test: Two-Sample Assuming Equal Variances					t-Test: Two-Sample Assuming Equal Variances						ANOVA
											Source of Variation	SS	df	MS	F	P-value	F crit
	Variable 1	Variable 2				Variable 1	Variable 2				Between Groups	3826.57	6	637.761	158.424	4.76255e-12	2.84773
Mean	100	71.2418			Mean	100	69.6078				Within Groups	56.3591	14	4.02565
Variance	5.80134	5.62153			Variance	5.80134	8.18465
Observations	3	3			Observations	3	3				Total	3882.92	20
Pooled Variance	5.71143				Pooled Variance	6.99299
Hypothesized Mean Difference	0				Hypothesized Mean Difference	0					50 ug/mL
df	4				df	4					Anova: Single Factor
t Stat	14.7379				t Stat	14.0759
P(T<=t) one-tail	6.16837e-05				P(T<=t) one-tail	7.39172e-05					SUMMARY
t Critical one-tail	2.13185				t Critical one-tail	2.13185					Groups	Count	Sum	Average	Variance
P(T<=t) two-tail	0.000123367				P(T<=t) two-tail	0.000147834					Column 1	3	300	100	5.80134
t Critical two-tail	2.77645				t Critical two-tail	2.77645					Column 2	3	303.922	101.307	2.32609
											Column 3	3	300.7	100.233	1.25704
t-Test: Two-Sample Assuming Equal Variances					t-Test: Two-Sample Assuming Equal Variances						Column 4	3	149.93	49.9767	2.26725
											Column 5	3	301.821	100.607	2.82629
	Variable 1	Variable 2				Variable 1	Variable 2				Column 6	3	305.392	101.797	2.07109
Mean	100	49.9767			Mean	100	46.1718				Column 7	3	138.515	46.1718	6.06288
Variance	5.80134	2.26725			Variance	5.80134	6.06288
Observations	3	3			Observations	3	3
Pooled Variance	4.03429				Pooled Variance	5.93211					ANOVA
Hypothesized Mean Difference	0				Hypothesized Mean Difference	0					Source of Variation	SS	df	MS	F	P-value	F crit
df	4				df	4					Between Groups	11937.8	6	1989.63	615.931	3.89983e-16	2.84773
t Stat	30.5024				t Stat	27.0677					Within Groups	45.224	14	3.23028
P(T<=t) one-tail	3.44094e-06				P(T<=t) one-tail	5.5383e-06
t Critical one-tail	2.13185				t Critical one-tail	2.13185					Total	11983	20
P(T<=t) two-tail	6.88188e-06				P(T<=t) two-tail	1.10766e-05
t Critical two-tail	2.77645				t Critical two-tail	2.77645					100 ug/mL
											Anova: Single Factor
t-Test: Two-Sample Assuming Equal Variances					t-Test: Two-Sample Assuming Equal Variances
											SUMMARY
	Variable 1	Variable 2				Variable 1	Variable 2				Groups	Count	Sum	Average	Variance
Mean	100	16.8067			Mean	100	13.9122				Column 1	3	300	100	5.80134
Variance	5.80134	4.85979			Variance	5.80134	1.38454				Column 2	3	300.98	100.327	3.2088
Observations	3	3			Observations	3	3				Column 3	3	300.7	100.233	4.3367
Pooled Variance	5.33056				Pooled Variance	3.59294					Column 4	3	50.4202	16.8067	4.85979
Hypothesized Mean Difference	0				Hypothesized Mean Difference	0					Column 5	3	302.871	100.957	0.364525
df	4				df	4					Column 6	3	301.611	100.537	0.786262
t Stat	44.1314				t Stat	55.624					Column 7	3	41.7367	13.9122	1.38454
P(T<=t) one-tail	7.88219e-07				P(T<=t) one-tail	3.12707e-07
t Critical one-tail	2.13185				t Critical one-tail	2.13185
P(T<=t) two-tail	1.57644e-06				P(T<=t) two-tail	6.25414e-07					ANOVA
t Critical two-tail	2.77645				t Critical two-tail	2.77645					Source of Variation	SS	df	MS	F	P-value	F crit
											Between Groups	31015.8	6	5169.31	1744.54	2.72456e-19	2.84773
											Within Groups	41.4839	14	2.96314
											Total	31057.3	20

## Sheet: 24h-frac
	Control			BF3.1_VS			BF3.2_VS			BF3.3_VS			BF3.4_VS			BF3_VS
1	1.287	1.245	1.265	1.302	1.274	1.26	1.262	1.275	1.311	1.271	1.298	1.302	1.314	1.303	1.303	1.292	1.241	1.235
10				1.241	1.293	1.258	1.302	1.299	1.245	1.244	1.236	1.221	1.269	1.243	1.267	1.187	1.118	1.142
50				1.312	1.279	1.265	1.264	1.313	1.307	1.062	1.114	1.088	1.275	1.301	1.251	0.971	1.015	1.114
100				1.266	1.232	1.277	1.242	1.274	1.269	0.981	0.969	1.013	1.264	1.312	1.307	0.965	0.885	0.896
	Control
	1.26567
	Control			BF3.1_VS			BF3.2_VS			BF3.3_VS			BF3.4_VS			BF3_VS
1	101.686	98.3671	99.9473	102.871	100.658	99.5523	99.7103	100.737	103.582	100.421	102.555	102.871	103.819	102.95	102.95	102.081	98.0511	97.577
10	101.686	98.3671	99.9473	98.0511	102.16	99.3943	102.871	102.634	98.3671	98.2881	97.656	96.4709	100.263	98.2091	100.105	93.7846	88.3329	90.2291
50	101.686	98.3671	99.9473	103.661	101.053	99.9473	99.8683	103.74	103.266	83.9083	88.0169	85.9626	100.737	102.792	98.8412	76.7185	80.1949	88.0169
100	101.686	98.3671	99.9473	100.026	97.34	100.895	98.1301	100.658	100.263	77.5086	76.5604	80.0369	99.8683	103.661	103.266	76.2444	69.9236	70.7927
	Control			BF3.1_VS			BF3.2_VS			BF3.3_VS			BF3.4_VS			BF3_VS
	average	stdev		average	stdev		average	stdev		average	stdev		average	stdev		average	stdev
1	100	1.65983		101.027	1.68965		101.343	2.00556		101.949	1.33228		103.239	0.501779		99.2362	2.47466
10				99.8683	2.09488		101.29	2.53448		97.4717	0.922533		99.5259	1.14314		90.7822	2.7676
50				101.554	1.90663		102.291	2.11169		85.9626	2.05425		100.79	1.97577		81.6434	5.7868
100				99.4206	1.8535		99.684	1.3601		78.0353	1.79707		102.265	2.08492		72.3203	3.42608
			Control	BF3.1_VS	BF3.2_VS	BF3.3_VS	BF3.4_VS	BF3_VS			10 ug/mL
		1	101.686	102.871	99.7103	100.421	103.819	102.081			Anova: Single Factor
			98.3671	100.658	100.737	102.555	102.95	98.0511
			99.9473	99.5523	103.582	102.871	102.95	97.577			SUMMARY
		10	101.686	98.0511	102.871	98.2881	100.263	93.7846			Groups	Count	Sum	Average	Variance
			98.3671	102.16	102.634	97.656	98.2091	88.3329			Column 1	3	300	100	2.75504
			99.9473	99.3943	98.3671	96.4709	100.105	90.2291			Column 2	3	299.605	99.8683	4.38851
		50	101.686	103.661	99.8683	83.9083	100.737	76.7185			Column 3	3	303.871	101.29	6.42357
			98.3671	101.053	103.74	88.0169	102.792	80.1949			Column 4	3	292.415	97.4717	0.851066
			99.9473	99.9473	103.266	85.9626	98.8412	88.0169			Column 5	3	298.578	99.5259	1.30677
		100	101.686	100.026	98.1301	77.5086	99.8683	76.2444			Column 6	3	272.347	90.7822	7.6596
			98.3671	97.34	100.658	76.5604	103.661	69.9236
			99.9473	100.895	100.263	80.0369	103.266	70.7927
											ANOVA
t-Test: Two-Sample Assuming Equal Variances											Source of Variation	SS	df	MS	F	P-value	F crit
											Between Groups	218.626	5	43.7252	11.219	0.000343598	3.10588
	Variable 1	Variable 2									Within Groups	46.7691	12	3.89743
Mean	100	90.7822
Variance	2.75504	7.6596									Total	265.395	17
Observations	3	3
Pooled Variance	5.20732										50 ug/mL
Hypothesized Mean Difference	0										Anova: Single Factor
df	4
t Stat	4.94727										SUMMARY
P(T<=t) one-tail	0.00388815										Groups	Count	Sum	Average	Variance
t Critical one-tail	2.13185										Column 1	3	300	100	2.75504
P(T<=t) two-tail	0.0077763										Column 2	3	304.662	101.554	3.63524
t Critical two-tail	2.77645										Column 3	3	306.874	102.291	4.45925
											Column 4	3	257.888	85.9626	4.21996
t-Test: Two-Sample Assuming Equal Variances					t-Test: Two-Sample Assuming Equal Variances						Column 5	3	302.37	100.79	3.90367
											Column 6	3	244.93	81.6434	33.4871
	Variable 1	Variable 2				Variable 1	Variable 2
Mean	100	85.9626			Mean	100	81.6434
Variance	2.75504	4.21996			Variance	2.75504	33.4871				ANOVA
Observations	3	3			Observations	3	3				Source of Variation	SS	df	MS	F	P-value	F crit
Pooled Variance	3.4875				Pooled Variance	18.1211					Between Groups	1241.63	5	248.326	28.4017	2.95826e-06	3.10588
Hypothesized Mean Difference	0				Hypothesized Mean Difference	0					Within Groups	104.92	12	8.74337
df	4				df	4
t Stat	9.20609				t Stat	5.28136					Total	1346.55	17
P(T<=t) one-tail	0.00038673				P(T<=t) one-tail	0.00308222
t Critical one-tail	2.13185				t Critical one-tail	2.13185					100 ug/mL
P(T<=t) two-tail	0.00077346				P(T<=t) two-tail	0.00616444					Anova: Single Factor
t Critical two-tail	2.77645				t Critical two-tail	2.77645
											SUMMARY
t-Test: Two-Sample Assuming Equal Variances					t-Test: Two-Sample Assuming Equal Variances						Groups	Count	Sum	Average	Variance
											Column 1	3	300	100	2.75504
	Variable 1	Variable 2				Variable 1	Variable 2				Column 2	3	298.262	99.4206	3.43548
Mean	100	78.0353			Mean	100	72.3203				Column 3	3	299.052	99.684	1.84987
Variance	2.75504	3.22947			Variance	2.75504	11.7381				Column 4	3	234.106	78.0353	3.22947
Observations	3	3			Observations	3	3				Column 5	3	306.795	102.265	4.34689
Pooled Variance	2.99226				Pooled Variance	7.24655					Column 6	3	216.961	72.3203	11.7381
Hypothesized Mean Difference	0				Hypothesized Mean Difference	0
df	4				df	4
t Stat	15.5515				t Stat	12.5934					ANOVA
P(T<=t) one-tail	4.99065e-05				P(T<=t) one-tail	0.000114423					Source of Variation	SS	df	MS	F	P-value	F crit
t Critical one-tail	2.13185				t Critical one-tail	2.13185					Between Groups	2597.31	5	519.462	113.939	1.10033e-09	3.10588
P(T<=t) two-tail	9.9813e-05				P(T<=t) two-tail	0.000228846					Within Groups	54.7096	12	4.55913
t Critical two-tail	2.77645				t Critical two-tail	2.77645
											Total	2652.02	17

## Sheet: 48h-frac
	Control			BF3.1_VS			BF3.2_VS			BF3.3_VS			BF3.4_VS			BF3_VS
1	1.428	1.396	1.41	1.452	1.429	1.404	1.445	1.387	1.422	1.412	1.43	1.402	1.454	1.498	1.435	1.401	1.368	1.398
10				1.436	1.425	1.378	1.478	1.411	1.433	1.362	1.313	1.342	1.425	1.427	1.395	1.139	1.175	1.181
50				1.462	1.419	1.407	1.399	1.365	1.431	1.074	1.146	1.138	1.412	1.464	1.451	0.878	0.925	0.909
100				1.403	1.398	1.436	1.421	1.465	1.434	0.937	0.921	0.996	1.402	1.433	1.429	0.561	0.632	0.566
	Control
	1.41133
	Control			BF3.1_VS			BF3.2_VS			BF3.3_VS			BF3.4_VS			BF3_VS
1	101.181	98.9136	99.9055	102.881	101.252	99.4804	102.385	98.2759	100.756	100.047	101.323	99.3387	103.023	106.141	101.677	99.2678	96.9296	99.0553
10	101.181	98.9136	99.9055	101.748	100.968	97.6382	104.724	99.9764	101.535	96.5045	93.0326	95.0874	100.968	101.11	98.8427	80.7038	83.2546	83.6797
50	101.181	98.9136	99.9055	103.59	100.543	99.693	99.1261	96.7171	101.393	76.0983	81.1998	80.633	100.047	103.732	102.811	62.2107	65.5409	64.4072
100	101.181	98.9136	99.9055	99.4095	99.0553	101.748	100.685	103.803	101.606	66.3911	65.2574	70.5716	99.3387	101.535	101.252	39.7496	44.7803	40.1039
	Control			BF3.1_VS			BF3.2_VS			BF3.3_VS			BF3.4_VS			BF3_VS
	average	stdev		average	stdev		average	stdev		average	stdev		average	stdev		average	stdev
1	100	1.13663		101.205	1.70101		100.472	2.0694		100.236	1.00538		103.614	2.28976		98.4176	1.29298
10				100.118	2.18275		102.078	2.41981		94.8748	1.74568		100.307	1.27013		82.5461	1.60952
50				101.275	2.04909		99.0789	2.33857		79.3103	2.79615		102.197	1.91745		64.0529	1.69312
100				100.071	1.463		102.031	1.6017		67.4067	2.79885		100.709	1.19477		41.5446	2.8078
			Control	BF3.1_VS	BF3.2_VS	BF3.3_VS	BF3.4_VS	BF3_VS		10 ug/mL
		1	101.181	102.881	102.385	100.047	103.023	99.2678		Anova: Single Factor
			98.9136	101.252	98.2759	101.323	106.141	96.9296
			99.9055	99.4804	100.756	99.3387	101.677	99.0553		SUMMARY
		10	101.181	101.748	104.724	96.5045	100.968	80.7038		Groups	Count	Sum	Average	Variance
			98.9136	100.968	99.9764	93.0326	101.11	83.2546		Column 1	3	300	100	1.29192
			99.9055	97.6382	101.535	95.0874	98.8427	83.6797		Column 2	3	300.354	100.118	4.76439
		50	101.181	103.59	99.1261	76.0983	100.047	62.2107		Column 3	3	306.235	102.078	5.85549
			98.9136	100.543	96.7171	81.1998	103.732	65.5409		Column 4	3	284.624	94.8748	3.0474
			99.9055	99.693	101.393	80.633	102.811	64.4072		Column 5	3	300.921	100.307	1.61323
		100	101.181	99.4095	100.685	66.3911	99.3387	39.7496		Column 6	3	247.638	82.5461	2.59054
			98.9136	99.0553	103.803	65.2574	101.535	44.7803
			99.9055	101.748	101.606	70.5716	101.252	40.1039
										ANOVA
t-Test: Two-Sample Assuming Equal Variances					t-Test: Two-Sample Assuming Equal Variances					Source of Variation	SS	df	MS	F	P-value	F crit
										Between Groups	804.492	5	160.898	50.3779	1.22148e-07	3.10588
	Variable 1	Variable 2				Variable 1	Variable 2			Within Groups	38.326	12	3.19383
Mean	100	94.8748			Mean	100	82.5461
Variance	1.29192	3.0474			Variance	1.29192	2.59054			Total	842.818	17
Observations	3	3			Observations	3	3
Pooled Variance	2.16966				Pooled Variance	1.94123				50 ug/mL
Hypothesized Mean Difference	0				Hypothesized Mean Difference	0				Anova: Single Factor
df	4				df	4
t Stat	4.26146				t Stat	15.3427				SUMMARY
P(T<=t) one-tail	0.00651921				P(T<=t) one-tail	5.26404e-05				Groups	Count	Sum	Average	Variance
t Critical one-tail	2.13185				t Critical one-tail	2.13185				Column 1	3	300	100	1.29192
P(T<=t) two-tail	0.0130384				P(T<=t) two-tail	0.000105281				Column 2	3	303.826	101.275	4.19875
t Critical two-tail	2.77645				t Critical two-tail	2.77645				Column 3	3	297.237	99.0789	5.46892
										Column 4	3	237.931	79.3103	7.81848
t-Test: Two-Sample Assuming Equal Variances					t-Test: Two-Sample Assuming Equal Variances					Column 5	3	306.59	102.197	3.67663
										Column 6	3	192.159	64.0529	2.86666
	Variable 1	Variable 2				Variable 1	Variable 2
Mean	100	79.3103			Mean	100	64.0529
Variance	1.29192	7.81848			Variance	1.29192	2.86666			ANOVA
Observations	3	3			Observations	3	3			Source of Variation	SS	df	MS	F	P-value	F crit
Pooled Variance	4.5552				Pooled Variance	2.07929				Between Groups	3720.02	5	744.004	176.295	8.45824e-11	3.10588
Hypothesized Mean Difference	0				Hypothesized Mean Difference	0				Within Groups	50.6427	12	4.22023
df	4				df	4
t Stat	11.8726				t Stat	30.5317				Total	3770.66	17
P(T<=t) one-tail	0.000144104				P(T<=t) one-tail	3.4278e-06
t Critical one-tail	2.13185				t Critical one-tail	2.13185				100 ug/mL
P(T<=t) two-tail	0.000288207				P(T<=t) two-tail	6.85561e-06				Anova: Single Factor
t Critical two-tail	2.77645				t Critical two-tail	2.77645
										SUMMARY
t-Test: Two-Sample Assuming Equal Variances					t-Test: Two-Sample Assuming Equal Variances					Groups	Count	Sum	Average	Variance
										Column 1	3	300	100	1.29192
	Variable 1	Variable 2				Variable 1	Variable 2			Column 2	3	300.213	100.071	2.14038
Mean	100	67.4067			Mean	100	41.5446			Column 3	3	306.094	102.031	2.56544
Variance	1.29192	7.83354			Variance	1.29192	7.88375			Column 4	3	202.22	67.4067	7.83354
Observations	3	3			Observations	3	3			Column 5	3	302.126	100.709	1.42748
Pooled Variance	4.56273				Pooled Variance	4.58784				Column 6	3	124.634	41.5446	7.88375
Hypothesized Mean Difference	0				Hypothesized Mean Difference	0
df	4				df	4
t Stat	18.6879				t Stat	33.4246				ANOVA
P(T<=t) one-tail	2.41341e-05				P(T<=t) one-tail	2.3893e-06				Source of Variation	SS	df	MS	F	P-value	F crit
t Critical one-tail	2.13185				t Critical one-tail	2.13185				Between Groups	9558.98	5	1911.8	495.658	1.82438e-13	3.10588
P(T<=t) two-tail	4.82682e-05				P(T<=t) two-tail	4.77859e-06				Within Groups	46.285	12	3.85708
t Critical two-tail	2.77645				t Critical two-tail	2.77645
										Total	9605.26	17

## Sheet: 72h-frac
	Control			BF3.1_VS			BF3.2_VS			BF3.3_VS			BF3.4_VS			BF3_VS
1	1.468	1.435	1.512	1.531	1.468	1.512	1.482	1.511	1.497	1.477	1.435	1.461	1.492	1.465	1.511	1.425	1.469	1.481
10				1.465	1.437	1.501	1.502	1.509	1.499	1.245	1.297	1.313	1.466	1.483	1.519	1.036	0.992	1.077
50				1.496	1.455	1.472	1.514	1.478	1.492	1.074	1.011	1.042	1.446	1.493	1.499	0.741	0.725	0.693
100				1.465	1.441	1.514	1.465	1.429	1.491	0.784	0.816	0.894	1.471	1.464	1.5	0.264	0.314	0.311
	Control
	1.47167
	Control			BF3.1_VS			BF3.2_VS			BF3.3_VS			BF3.4_VS			BF3_VS
1	99.7508	97.5085	102.741	104.032	99.7508	102.741	100.702	102.673	101.721	100.362	97.5085	99.2752	101.382	99.547	102.673	96.829	99.8188	100.634
10	99.7508	97.5085	102.741	99.547	97.6444	101.993	102.061	102.537	101.857	84.598	88.1314	89.2186	99.6149	100.77	103.216	70.3964	67.4066	73.1823
50	99.7508	97.5085	102.741	101.653	98.8675	100.023	102.877	100.43	101.382	72.9785	68.6976	70.8041	98.2559	101.45	101.857	50.3511	49.2639	47.0895
100	99.7508	97.5085	102.741	99.547	97.9162	102.877	99.547	97.1008	101.314	53.2729	55.4473	60.7475	99.9547	99.479	101.925	17.9388	21.3364	21.1325
	Control			BF3.1_VS			BF3.2_VS			BF3.3_VS			BF3.4_VS			BF3_VS
	average	stdev		average	stdev		average	stdev		average	stdev		average	stdev		average	stdev
1	100	2.62496		102.174	2.19589		101.699	0.985473		99.0487	1.44037		101.2	1.57071		99.094	2.00347
10				99.7282	2.18006		102.152	0.348693		87.316	2.41582		101.2	1.83884		70.3284	2.88848
50				100.181	1.39973		101.563	1.23313		70.8267	2.14052		100.521	1.97212		48.9015	1.66073
100				100.113	2.5282		99.3205	2.11557		56.4892	3.84464		100.453	1.297		20.1359	1.90543
			Control	BF3.1_VS	BF3.2_VS	BF3.3_VS	BF3.4_VS	BF3_VS		10 ug/mL
		1	99.7508	104.032	100.702	100.362	101.382	96.829		Anova: Single Factor
			97.5085	99.7508	102.673	97.5085	99.547	99.8188
			102.741	102.741	101.721	99.2752	102.673	100.634		SUMMARY
		10	99.7508	99.547	102.061	84.598	99.6149	70.3964		Groups	Count	Sum	Average	Variance
			97.5085	97.6444	102.537	88.1314	100.77	67.4066		Column 1	3	300	100	6.89044
			102.741	101.993	101.857	89.2186	103.216	73.1823		Column 2	3	299.185	99.7282	4.75266
		50	99.7508	101.653	102.877	72.9785	98.2559	50.3511		Column 3	3	306.455	102.152	0.121587
			97.5085	98.8675	100.43	68.6976	101.45	49.2639		Column 4	3	261.948	87.316	5.83617
			102.741	100.023	101.382	70.8041	101.857	47.0895		Column 5	3	303.601	101.2	3.38135
		100	99.7508	99.547	99.547	53.2729	99.9547	17.9388		Column 6	3	210.985	70.3284	8.34333
			97.5085	97.9162	97.1008	55.4473	99.479	21.3364
			102.741	102.877	101.314	60.7475	101.925	21.1325
										ANOVA
t-Test: Two-Sample Assuming Equal Variances					t-Test: Two-Sample Assuming Equal Variances					Source of Variation	SS	df	MS	F	P-value	F crit
										Between Groups	2371.03	5	474.205	97.0223	2.81172e-09	3.10588
	Variable 1	Variable 2				Variable 1	Variable 2			Within Groups	58.6511	12	4.88759
Mean	100	87.316			Mean	100	70.3284
Variance	6.89044	5.83617			Variance	6.89044	8.34333			Total	2429.68	17
Observations	3	3			Observations	3	3
Pooled Variance	6.36331				Pooled Variance	7.61688				50 ug/mL
Hypothesized Mean Difference	0				Hypothesized Mean Difference	0				Anova: Single Factor
df	4				df	4
t Stat	6.15831				t Stat	13.1673				SUMMARY
P(T<=t) one-tail	0.00176418				P(T<=t) one-tail	9.60757e-05				Groups	Count	Sum	Average	Variance
t Critical one-tail	2.13185				t Critical one-tail	2.13185				Column 1	3	300	100	6.89044
P(T<=t) two-tail	0.00352836				P(T<=t) two-tail	0.000192151				Column 2	3	300.544	100.181	1.95924
t Critical two-tail	2.77645				t Critical two-tail	2.77645				Column 3	3	304.689	101.563	1.52061
										Column 4	3	212.48	70.8267	4.58183
t-Test: Two-Sample Assuming Equal Variances					t-Test: Two-Sample Assuming Equal Variances					Column 5	3	301.563	100.521	3.88924
										Column 6	3	146.704	48.9015	2.75802
	Variable 1	Variable 2				Variable 1	Variable 2
Mean	100	70.8267			Mean	100	48.9015
Variance	6.89044	4.58183			Variance	6.89044	2.75802			ANOVA
Observations	3	3			Observations	3	3			Source of Variation	SS	df	MS	F	P-value	F crit
Pooled Variance	5.73613				Pooled Variance	4.82423				Between Groups	7352.13	5	1470.43	408.463	5.78148e-13	3.10588
Hypothesized Mean Difference	0				Hypothesized Mean Difference	0				Within Groups	43.1988	12	3.5999
df	4				df	4
t Stat	14.9184				t Stat	28.4931				Total	7395.33	17
P(T<=t) one-tail	5.87947e-05				P(T<=t) one-tail	4.51444e-06
t Critical one-tail	2.13185				t Critical one-tail	2.13185				100 ug/mL
P(T<=t) two-tail	0.000117589				P(T<=t) two-tail	9.02887e-06				Anova: Single Factor
t Critical two-tail	2.77645				t Critical two-tail	2.77645
										SUMMARY
t-Test: Two-Sample Assuming Equal Variances					t-Test: Two-Sample Assuming Equal Variances					Groups	Count	Sum	Average	Variance
										Column 1	3	300	100	6.89044
	Variable 1	Variable 2				Variable 1	Variable 2			Column 2	3	300.34	100.113	6.39178
Mean	100	56.4892			Mean	100	20.1359			Column 3	3	297.961	99.3205	4.47563
Variance	6.89044	14.7813			Variance	6.89044	3.63068			Column 4	3	169.468	56.4892	14.7813
Observations	3	3			Observations	3	3			Column 5	3	301.359	100.453	1.68221
Pooled Variance	10.8359				Pooled Variance	5.26056				Column 6	3	60.4077	20.1359	3.63068
Hypothesized Mean Difference	0				Hypothesized Mean Difference	0
df	4				df	4
t Stat	16.1886				t Stat	42.6463				ANOVA
P(T<=t) one-tail	4.25903e-05				P(T<=t) one-tail	9.03662e-07				Source of Variation	SS	df	MS	F	P-value	F crit
t Critical one-tail	2.13185				t Critical one-tail	2.13185				Between Groups	17191.8	5	3438.35	545.02	1.03542e-13	3.10588
P(T<=t) two-tail	8.51807e-05				P(T<=t) two-tail	1.80732e-06				Within Groups	75.704	12	6.30867
t Critical two-tail	2.77645				t Critical two-tail	2.77645
										Total	17267.5	17
