# Supplementary material for: Phospholipase A2 from krait Bungarus fasciatus venom induces human cancer cell death in vitro
Source: PeerJ. 2019 Dec 3;7:e8055. doi: 10.7717/peerj.8055 (PMC6896944; doi:10.7717/peerj.8055)
Supplement: Supplemental Information 6 [file peerj-07-8055-s006.xlsx]

## Sheet: 24h
	Control			BF1_VS			BF2_VS			BF3_VS			BF4_VS			BF5_VS			BF_VS
1	1.282	1.235	1.264	1.274	1.235	1.269	1.262	1.249	1.317	1.297	1.265	1.277	1.299	1.261	1.235	1.277	1.245	1.268	1.244	1.273	1.249
10				1.247	1.263	1.312	1.284	1.287	1.231	1.124	1.105	1.112	1.261	1.312	1.308	1.293	1.257	1.259	1.169	1.075	1.046
50				1.271	1.263	1.308	1.246	1.272	1.296	0.975	0.961	1.013	1.266	1.281	1.283	1.267	1.305	1.301	1.016	0.973	0.895
100				1.249	1.237	1.304	1.275	1.277	1.313	0.914	0.872	0.835	1.263	1.251	1.303	1.265	1.244	1.272	0.901	0.845	0.816
	Control
	1.26033
	Control			BF1_VS			BF2_VS			BF3_VS			BF4_VS			BF5_VS			BF_VS
1	101.719	97.9899	100.291	101.084	97.9899	100.688	100.132	99.1008	104.496	102.909	100.37	101.322	103.068	100.053	97.9899	101.322	98.7834	100.608	98.704	101.005	99.1008
10	101.719	97.9899	100.291	98.9421	100.212	104.099	101.878	102.116	97.6726	89.1828	87.6752	88.2306	100.053	104.099	103.782	102.592	99.7355	99.8942	92.7532	85.2949	82.9939
50	101.719	97.9899	100.291	100.846	100.212	103.782	98.8627	100.926	102.83	77.3605	76.2497	80.3756	100.45	101.64	101.798	100.529	103.544	103.227	80.6136	77.2018	71.013
100	101.719	97.9899	100.291	99.1008	98.1486	103.465	101.164	101.322	104.179	72.5205	69.188	66.2523	100.212	99.2595	103.385	100.37	98.704	100.926	71.489	67.0458	64.7448
	Control			BF1_VS			BF2_VS			BF3_VS			BF4_VS			BF5_VS			BF_VS
	average	stdev		average	stdev		average	stdev		average	stdev		average	stdev		average	stdev		average	stdev
1	100	1.88153		99.9207	1.68377		101.243	2.86409		101.534	1.28266		100.37	2.55384		100.238	1.30938		99.6033	1.23005
10				101.084	2.68718		100.555	2.49944		88.3629	0.762419		102.645	2.25026		100.741	1.60529		87.014	5.10173
50				101.613	1.90481		100.873	1.98413		77.9952	2.13493		101.296	0.737231		102.433	1.65675		76.2761	4.8668
100				100.238	2.83463		102.222	1.6968		69.3203	3.13618		100.952	2.16034		100	1.15618		67.7599	3.42836
			Control	BF1_VS	BF2_VS	BF3_VS	BF4_VS	BF5_VS	BF_VS		10 ug/mL
		1	101.719	101.084	100.132	102.909	103.068	101.322	98.704		Anova: Single Factor
			97.9899	97.9899	99.1008	100.37	100.053	98.7834	101.005
			100.291	100.688	104.496	101.322	97.9899	100.608	99.1008		SUMMARY
		10	101.719	98.9421	101.878	89.1828	100.053	102.592	92.7532		Groups	Count	Sum	Average	Variance
			97.9899	100.212	102.116	87.6752	104.099	99.7355	85.2949		Column 1	3	300	100	3.54016
			100.291	104.099	97.6726	88.2306	103.782	99.8942	82.9939		Column 2	3	303.253	101.084	7.22092
		50	101.719	100.846	98.8627	77.3605	100.45	100.529	80.6136		Column 3	3	301.666	100.555	6.24722
			97.9899	100.212	100.926	76.2497	101.64	103.544	77.2018		Column 4	3	265.089	88.3629	0.581283
			100.291	103.782	102.83	80.3756	101.798	103.227	71.013		Column 5	3	307.934	102.645	5.06367
		100	101.719	99.1008	101.164	72.5205	100.212	100.37	71.489		Column 6	3	302.222	100.741	2.57695
			97.9899	98.1486	101.322	69.188	99.2595	98.704	67.0458		Column 7	3	261.042	87.014	26.0276
			100.291	103.465	104.179	66.2523	103.385	100.926	64.7448
	t-Test: Two-Sample Assuming Equal Variances					t-Test: Two-Sample Assuming Equal Variances					ANOVA
											Source of Variation	SS	df	MS	F	P-value	F crit
		Variable 1	Variable 2				Variable 1	Variable 2			Between Groups	774.653	6	129.109	17.6317	8.64255e-06	2.84773
	Mean	100	88.3629			Mean	100	87.014			Within Groups	102.516	14	7.32255
	Variance	3.54016	0.581283			Variance	3.54016	26.0276
	Observations	3	3			Observations	3	3			Total	877.168	20
	Pooled Variance	2.06072				Pooled Variance	14.7839
	Hypothesized Mean Difference	0				Hypothesized Mean Difference	0				50 ug/mL
	df	4				df	4				Anova: Single Factor
	t Stat	9.92846				t Stat	4.13643
	P(T<=t) one-tail	0.00028892				P(T<=t) one-tail	0.00720913				SUMMARY
	t Critical one-tail	2.13185				t Critical one-tail	2.13185				Groups	Count	Sum	Average	Variance
	P(T<=t) two-tail	0.000577841				P(T<=t) two-tail	0.0144183				Column 1	3	300	100	3.54016
	t Critical two-tail	2.77645				t Critical two-tail	2.77645				Column 2	3	304.84	101.613	3.6283
											Column 3	3	302.618	100.873	3.93678
	t-Test: Two-Sample Assuming Equal Variances					t-Test: Two-Sample Assuming Equal Variances					Column 4	3	233.986	77.9952	4.55793
											Column 5	3	303.888	101.296	0.54351
		Variable 1	Variable 2				Variable 1	Variable 2			Column 6	3	307.3	102.433	2.74483
	Mean	100	77.9952			Mean	100	76.2761			Column 7	3	228.828	76.2761	23.6857
	Variance	3.54016	4.55793			Variance	3.54016	23.6857
	Observations	3	3			Observations	3	3
	Pooled Variance	4.04905				Pooled Variance	13.6129				ANOVA
	Hypothesized Mean Difference	0				Hypothesized Mean Difference	0				Source of Variation	SS	df	MS	F	P-value	F crit
	df	4				df	4				Between Groups	2504.86	6	417.477	68.5396	1.42363e-09	2.84773
	t Stat	13.3932				t Stat	7.87509				Within Groups	85.2744	14	6.09103
	P(T<=t) one-tail	8.98684e-05				P(T<=t) one-tail	0.000702746
	t Critical one-tail	2.13185				t Critical one-tail	2.13185				Total	2590.13	20
	P(T<=t) two-tail	0.000179737				P(T<=t) two-tail	0.00140549
	t Critical two-tail	2.77645				t Critical two-tail	2.77645				100 ug/mL
											Anova: Single Factor
	t-Test: Two-Sample Assuming Equal Variances					t-Test: Two-Sample Assuming Equal Variances
											SUMMARY
		Variable 1	Variable 2				Variable 1	Variable 2			Groups	Count	Sum	Average	Variance
	Mean	100	69.3203			Mean	100	67.7599			Column 1	3	300	100	3.54016
	Variance	3.54016	9.83565			Variance	3.54016	11.7537			Column 2	3	300.714	100.238	8.03514
	Observations	3	3			Observations	3	3			Column 3	3	306.665	102.222	2.87913
	Pooled Variance	6.6879				Pooled Variance	7.64692				Column 4	3	207.961	69.3203	9.83565
	Hypothesized Mean Difference	0				Hypothesized Mean Difference	0				Column 5	3	302.856	100.952	4.66705
	df	4				df	4				Column 6	3	300	100	1.33674
	t Stat	14.5295				t Stat	14.2791				Column 7	3	203.28	67.7599	11.7537
	P(T<=t) one-tail	6.52412e-05				P(T<=t) one-tail	6.98642e-05
	t Critical one-tail	2.13185				t Critical one-tail	2.13185
	P(T<=t) two-tail	0.000130482				P(T<=t) two-tail	0.000139728				ANOVA
	t Critical two-tail	2.77645				t Critical two-tail	2.77645				Source of Variation	SS	df	MS	F	P-value	F crit
											Between Groups	4442.05	6	740.342	123.251	2.66294e-11	2.84773
											Within Groups	84.0951	14	6.00679
											Total	4526.15	20

## Sheet: 48h
	Control			BF1_VS			BF2_VS			BF3_VS			BF4_VS			BF5_VS			BF_VS
1	1.387	1.365	1.392	1.412	1.384	1.399	1.362	1.401	1.385	1.361	1.383	1.378	1.399	1.37	1.404	1.385	1.419	1.422	1.365	1.402	1.377
10				1.404	1.409	1.371	1.383	1.419	1.393	1.264	1.244	1.291	1.376	1.402	1.394	1.403	1.376	1.401	1.247	1.313	1.308
50				1.382	1.369	1.401	1.387	1.361	1.396	1.079	1.032	0.982	1.385	1.421	1.415	1.393	1.395	1.402	0.996	1.015	1.049
100				1.395	1.386	1.374	1.405	1.389	1.363	0.769	0.715	0.737	1.372	1.409	1.397	1.377	1.413	1.369	0.799	0.713	0.816
	Control
	1.38133
	Control			BF1_VS			BF2_VS			BF3_VS			BF4_VS			BF5_VS			BF_VS
1	100.41	98.8176	100.772	102.22	100.193	101.279	98.6004	101.424	100.265	98.528	100.121	99.7587	101.279	99.1795	101.641	100.265	102.727	102.944	98.8176	101.496	99.6863
10	100.41	98.8176	100.772	101.641	102.003	99.2519	100.121	102.727	100.845	91.5058	90.0579	93.4604	99.6139	101.496	100.917	101.569	99.6139	101.424	90.2751	95.0531	94.6911
50	100.41	98.8176	100.772	100.048	99.1071	101.424	100.41	98.528	101.062	78.1129	74.7104	71.0907	100.265	102.872	102.437	100.845	100.989	101.496	72.1042	73.4797	75.9411
100	100.41	98.8176	100.772	100.989	100.338	99.4691	101.713	100.555	98.6728	55.6708	51.7616	53.3542	99.3243	102.003	101.134	99.6863	102.292	99.1071	57.8427	51.6168	59.0734
	Control			BF1_VS			BF2_VS			BF3_VS			BF4_VS			BF5_VS			BF_VS
	average	stdev		average	stdev		average	stdev		average	stdev		average	stdev		average	stdev		average	stdev
1	100	1.03989		101.231	1.01437		100.097	1.41924		99.4691	0.834886		100.7	1.32897		101.979	1.48775		100	1.36656
10				100.965	1.49478		101.231	1.34531		91.6747	1.70753		100.676	0.964044		100.869	1.08912		93.3398	2.66025
50				100.193	1.16507		100	1.31576		74.638	3.51166		101.858	1.39628		101.11	0.34212		73.8417	1.94388
100				100.265	0.762716		100.314	1.53457		53.5956	1.96577		100.82	1.36656		100.362	1.69676		56.1776	3.99742
			Control	BF1_VS	BF2_VS	BF3_VS	BF4_VS	BF5_VS	BF_VS		10 ug/mL
		1	100.41	102.22	98.6004	98.528	101.279	100.265	98.8176		Anova: Single Factor
			98.8176	100.193	101.424	100.121	99.1795	102.727	101.496
			100.772	101.279	100.265	99.7587	101.641	102.944	99.6863		SUMMARY
		10	100.41	101.641	100.121	91.5058	99.6139	101.569	90.2751		Groups	Count	Sum	Average	Variance
			98.8176	102.003	102.727	90.0579	101.496	99.6139	95.0531		Column 1	3	300	100	1.08137
			100.772	99.2519	100.845	93.4604	100.917	101.424	94.6911		Column 2	3	302.896	100.965	2.23436
		50	100.41	100.048	100.41	78.1129	100.265	100.845	72.1042		Column 3	3	303.692	101.231	1.80985
			98.8176	99.1071	98.528	74.7104	102.872	100.989	73.4797		Column 4	3	275.024	91.6747	2.91567
			100.772	101.424	101.062	71.0907	102.437	101.496	75.9411		Column 5	3	302.027	100.676	0.92938
		100	100.41	100.989	101.713	55.6708	99.3243	99.6863	57.8427		Column 6	3	302.606	100.869	1.18618
			98.8176	100.338	100.555	51.7616	102.003	102.292	51.6168		Column 7	3	280.019	93.3398	7.07692
			100.772	99.4691	98.6728	53.3542	101.134	99.1071	59.0734
t-Test: Two-Sample Assuming Equal Variances					t-Test: Two-Sample Assuming Equal Variances						ANOVA
											Source of Variation	SS	df	MS	F	P-value	F crit
	Variable 1	Variable 2				Variable 1	Variable 2				Between Groups	297.785	6	49.6309	20.1591	3.84856e-06	2.84773
Mean	100	91.6747			Mean	100	93.3398				Within Groups	34.4674	14	2.46196
Variance	1.08137	2.91567			Variance	1.08137	7.07692
Observations	3	3			Observations	3	3				Total	332.253	20
Pooled Variance	1.99852				Pooled Variance	4.07914
Hypothesized Mean Difference	0				Hypothesized Mean Difference	0					50 ug/mL
df	4				df	4					Anova: Single Factor
t Stat	7.21259				t Stat	4.03878
P(T<=t) one-tail	0.000979612				P(T<=t) one-tail	0.00780984					SUMMARY
t Critical one-tail	2.13185				t Critical one-tail	2.13185					Groups	Count	Sum	Average	Variance
P(T<=t) two-tail	0.00195922				P(T<=t) two-tail	0.0156197					Column 1	3	300	100	1.08137
t Critical two-tail	2.77645				t Critical two-tail	2.77645					Column 2	3	300.579	100.193	1.35738
											Column 3	3	300	100	1.73123
t-Test: Two-Sample Assuming Equal Variances					t-Test: Two-Sample Assuming Equal Variances						Column 4	3	223.914	74.638	12.3318
											Column 5	3	305.574	101.858	1.9496
	Variable 1	Variable 2				Variable 1	Variable 2				Column 6	3	303.33	101.11	0.117046
Mean	100	74.638			Mean	100	73.8417				Column 7	3	221.525	73.8417	3.77866
Variance	1.08137	12.3318			Variance	1.08137	3.77866
Observations	3	3			Observations	3	3
Pooled Variance	6.70656				Pooled Variance	2.43001					ANOVA
Hypothesized Mean Difference	0				Hypothesized Mean Difference	0					Source of Variation	SS	df	MS	F	P-value	F crit
df	4				df	4					Between Groups	2994.37	6	499.061	156.326	5.2195e-12	2.84773
t Stat	11.9944				t Stat	20.5518					Within Groups	44.6941	14	3.19244
P(T<=t) one-tail	0.000138467				P(T<=t) one-tail	1.65537e-05
t Critical one-tail	2.13185				t Critical one-tail	2.13185					Total	3039.06	20
P(T<=t) two-tail	0.000276933				P(T<=t) two-tail	3.31074e-05
t Critical two-tail	2.77645				t Critical two-tail	2.77645					100 ug/mL
											Anova: Single Factor
t-Test: Two-Sample Assuming Equal Variances					t-Test: Two-Sample Assuming Equal Variances
											SUMMARY
	Variable 1	Variable 2				Variable 1	Variable 2				Groups	Count	Sum	Average	Variance
Mean	100	53.5956			Mean	100	56.1776				Column 1	3	300	100	1.08137
Variance	1.08137	3.86426			Variance	1.08137	15.9794				Column 2	3	300.796	100.265	0.581736
Observations	3	3			Observations	3	3				Column 3	3	300.941	100.314	2.3549
Pooled Variance	2.47282				Pooled Variance	8.53038					Column 4	3	160.787	53.5956	3.86426
Hypothesized Mean Difference	0				Hypothesized Mean Difference	0					Column 5	3	302.461	100.82	1.8675
df	4				df	4					Column 6	3	301.086	100.362	2.87898
t Stat	36.1418				t Stat	18.3763					Column 7	3	168.533	56.1776	15.9794
P(T<=t) one-tail	1.74933e-06				P(T<=t) one-tail	2.57968e-05
t Critical one-tail	2.13185				t Critical one-tail	2.13185
P(T<=t) two-tail	3.49865e-06				P(T<=t) two-tail	5.15936e-05					ANOVA
t Critical two-tail	2.77645				t Critical two-tail	2.77645					Source of Variation	SS	df	MS	F	P-value	F crit
											Between Groups	8870.2	6	1478.37	361.735	1.58116e-14	2.84773
											Within Groups	57.2163	14	4.08688
											Total	8927.42	20

## Sheet: 72h
	Control			BF1_VS			BF2_VS			BF3_VS			BF4_VS			BF5_VS			BF_VS
1	1.319	1.342	1.307	1.346	1.325	1.309	1.319	1.322	1.346	1.32	1.361	1.315	1.327	1.396	1.414	1.361	1.366	1.342	1.312	1.298	1.314
10				1.383	1.327	1.362	1.31	1.339	1.315	1.118	1.073	1.096	1.322	1.351	1.358	1.329	1.379	1.34	1.042	1.114	1.061
50				1.319	1.343	1.327	1.367	1.323	1.311	0.769	0.735	0.714	1.347	1.359	1.336	1.361	1.347	1.353	0.815	0.784	0.669
100				1.375	1.336	1.312	1.354	1.326	1.373	0.246	0.275	0.279	1.329	1.313	1.347	1.329	1.317	1.366	0.276	0.213	0.292
	Control
	1.32267
	Control			BF1_VS			BF2_VS			BF3_VS			BF4_VS			BF5_VS			BF_VS
1	99.7228	101.462	98.8155	101.764	100.176	98.9667	99.7228	99.9496	101.764	99.7984	102.898	99.4204	100.328	105.544	106.905	102.898	103.276	101.462	99.1935	98.1351	99.3448
10	99.7228	101.462	98.8155	104.561	100.328	102.974	99.0423	101.235	99.4204	84.5262	81.124	82.8629	99.9496	102.142	102.671	100.479	104.259	101.31	78.7802	84.2238	80.2167
50	99.7228	101.462	98.8155	99.7228	101.537	100.328	103.352	100.025	99.1179	58.1401	55.5696	53.9819	101.84	102.747	101.008	102.898	101.84	102.293	61.6179	59.2742	50.5796
100	99.7228	101.462	98.8155	103.957	101.008	99.1935	102.369	100.252	103.805	18.5988	20.7913	21.0938	100.479	99.2692	101.84	100.479	99.5716	103.276	20.8669	16.1038	22.0766
	Control			BF1_VS			BF2_VS			BF3_VS			BF4_VS			BF5_VS			BF_VS
	average	stdev		average	stdev		average	stdev		average	stdev		average	stdev		average	stdev		average	stdev
1	100	1.34469		100.302	1.40294		100.479	1.11885		100.706	1.90818		104.259	3.47207		102.545	0.95733		98.8911	0.659108
10				102.621	2.13887		99.8992	1.17208		82.8377	1.70125		101.588	1.44311		102.016	1.98646		81.0736	2.82112
50				100.529	0.923906		100.832	2.22917		55.8972	2.0984		101.865	0.86973		102.344	0.531031		57.1573	5.81568
100				101.386	2.40395		102.142	1.78754		20.1613	1.36159		100.529	1.28602		101.109	1.93101		19.6825	3.15765
			Control	BF1_VS	BF2_VS	BF3_VS	BF4_VS	BF5_VS	BF_VS		10 ug/mL
		1	99.7228	101.764	99.7228	99.7984	100.328	102.898	99.1935		Anova: Single Factor
			101.462	100.176	99.9496	102.898	105.544	103.276	98.1351
			98.8155	98.9667	101.764	99.4204	106.905	101.462	99.3448		SUMMARY
		10	99.7228	104.561	99.0423	84.5262	99.9496	100.479	78.7802		Groups	Count	Sum	Average	Variance
			101.462	100.328	101.235	81.124	102.142	104.259	84.2238		Column 1	3	300	100	1.80819
			98.8155	102.974	99.4204	82.8629	102.671	101.31	80.2167		Column 2	3	307.863	102.621	4.57478
		50	99.7228	99.7228	103.352	58.1401	101.84	102.898	61.6179		Column 3	3	299.698	99.8992	1.37377
			101.462	101.537	100.025	55.5696	102.747	101.84	59.2742		Column 4	3	248.513	82.8377	2.89425
			98.8155	100.328	99.1179	53.9819	101.008	102.293	50.5796		Column 5	3	304.763	101.588	2.08256
		100	99.7228	103.957	102.369	18.5988	100.479	100.479	20.8669		Column 6	3	306.048	102.016	3.94601
			101.462	101.008	100.252	20.7913	99.2692	99.5716	16.1038		Column 7	3	243.221	81.0736	7.9587
			98.8155	99.1935	103.805	21.0938	101.84	103.276	22.0766
t-Test: Two-Sample Assuming Equal Variances					t-Test: Two-Sample Assuming Equal Variances						ANOVA
											Source of Variation	SS	df	MS	F	P-value	F crit
	Variable 1	Variable 2				Variable 1	Variable 2				Between Groups	1613.85	6	268.975	76.4187	6.84696e-10	2.84773
Mean	100	82.8377			Mean	100	81.0736				Within Groups	49.2765	14	3.51975
Variance	1.80819	2.89425			Variance	1.80819	7.9587
Observations	3	3			Observations	3	3				Total	1663.13	20
Pooled Variance	2.35122				Pooled Variance	4.88345
Hypothesized Mean Difference	0				Hypothesized Mean Difference	0					50 ug/mL
df	4				df	4					Anova: Single Factor
t Stat	13.708				t Stat	10.4894
P(T<=t) one-tail	8.20295e-05				P(T<=t) one-tail	0.000233481					SUMMARY
t Critical one-tail	2.13185				t Critical one-tail	2.13185					Groups	Count	Sum	Average	Variance
P(T<=t) two-tail	0.000164059				P(T<=t) two-tail	0.000466963					Column 1	3	300	100	1.80819
t Critical two-tail	2.77645				t Critical two-tail	2.77645					Column 2	3	301.588	100.529	0.853603
											Column 3	3	302.495	100.832	4.96919
t-Test: Two-Sample Assuming Equal Variances					t-Test: Two-Sample Assuming Equal Variances						Column 4	3	167.692	55.8972	4.4033
											Column 5	3	305.595	101.865	0.756429
	Variable 1	Variable 2				Variable 1	Variable 2				Column 6	3	307.031	102.344	0.281994
Mean	100	55.8972			Mean	100	57.1573				Column 7	3	171.472	57.1573	33.8221
Variance	1.80819	4.4033			Variance	1.80819	33.8221
Observations	3	3			Observations	3	3
Pooled Variance	3.10574				Pooled Variance	17.8152					ANOVA
Hypothesized Mean Difference	0				Hypothesized Mean Difference	0					Source of Variation	SS	df	MS	F	P-value	F crit
df	4				df	4					Between Groups	8533.48	6	1422.25	212.299	6.33826e-13	2.84773
t Stat	30.6499				t Stat	12.4316					Within Groups	93.7896	14	6.69926
P(T<=t) one-tail	3.37543e-06				P(T<=t) one-tail	0.000120366
t Critical one-tail	2.13185				t Critical one-tail	2.13185					Total	8627.27	20
P(T<=t) two-tail	6.75085e-06				P(T<=t) two-tail	0.000240732
t Critical two-tail	2.77645				t Critical two-tail	2.77645					100 ug/mL
											Anova: Single Factor
t-Test: Two-Sample Assuming Equal Variances					t-Test: Two-Sample Assuming Equal Variances
											SUMMARY
	Variable 1	Variable 2				Variable 1	Variable 2				Groups	Count	Sum	Average	Variance
Mean	100	20.1613			Mean	100	19.6825				Column 1	3	300	100	1.80819
Variance	1.80819	1.85392			Variance	1.80819	9.97077				Column 2	3	304.158	101.386	5.77897
Observations	3	3			Observations	3	3				Column 3	3	306.426	102.142	3.1953
Pooled Variance	1.83105				Pooled Variance	5.88948					Column 4	3	60.4839	20.1613	1.85392
Hypothesized Mean Difference	0				Hypothesized Mean Difference	0					Column 5	3	301.588	100.529	1.65386
df	4				df	4					Column 6	3	303.327	101.109	3.7288
t Stat	72.2618				t Stat	40.5338					Column 7	3	59.0474	19.6825	9.97077
P(T<=t) one-tail	1.09884e-07				P(T<=t) one-tail	1.10686e-06
t Critical one-tail	2.13185				t Critical one-tail	2.13185
P(T<=t) two-tail	2.19767e-07				P(T<=t) two-tail	2.21371e-06					ANOVA
t Critical two-tail	2.77645				t Critical two-tail	2.77645					Source of Variation	SS	df	MS	F	P-value	F crit
											Between Groups	28204.4	6	4700.73	1175.61	4.29302e-18	2.84773
											Within Groups	55.9796	14	3.99854
											Total	28260.3	20

## Sheet: 24h-frac
	Control			BF3.1_VS			BF3.2_VS			BF3.3_VS			BF3.4_VS			BF3_VS
1	1.287	1.245	1.265	1.294	1.247	1.261	1.269	1.305	1.313	1.269	1.237	1.295	1.292	1.273	1.261	1.229	1.276	1.282
10				1.311	1.291	1.272	1.278	1.253	1.301	1.148	1.197	1.239	1.258	1.304	1.26	1.185	1.097	1.144
50				1.264	1.294	1.307	1.264	1.273	1.274	1.176	1.109	1.113	1.311	1.303	1.296	1.045	1.015	1.076
100				1.28	1.276	1.254	1.294	1.268	1.242	0.972	0.916	0.901	1.259	1.274	1.274	0.845	0.885	0.896
	Control
	1.26567
	Control			BF3.1_VS			BF3.2_VS			BF3.3_VS			BF3.4_VS			BF3_VS
1	101.686	98.3671	99.9473	102.239	98.5252	99.6313	100.263	103.108	103.74	100.263	97.7351	102.318	102.081	100.579	99.6313	97.103	100.816	101.29
10	101.686	98.3671	99.9473	103.582	102.002	100.5	100.974	98.9992	102.792	90.7032	94.5747	97.8931	99.3943	103.029	99.5523	93.6265	86.6737	90.3871
50	101.686	98.3671	99.9473	99.8683	102.239	103.266	99.8683	100.579	100.658	92.9155	87.6218	87.9378	103.582	102.95	102.397	82.5652	80.1949	85.0145
100	101.686	98.3671	99.9473	101.132	100.816	99.0782	102.239	100.184	98.1301	76.7975	72.3729	71.1878	99.4733	100.658	100.658	66.7632	69.9236	70.7927
	Control			BF3.1_VS			BF3.2_VS			BF3.3_VS			BF3.4_VS			BF3_VS
	average	stdev		average	stdev		average	stdev		average	stdev		average	stdev		average	stdev
1	100	1.65983		100.132	1.90663		102.37	1.85182		100.105	2.29537		100.764	1.23501		99.7366	2.2931
10				102.028	1.54086		100.922	1.89678		94.3903	3.59849		100.658	2.05425		90.2291	3.47912
50				101.791	1.7424		100.369	0.435152		89.4917	2.96927		102.976	0.593012		82.5915	2.40991
100				100.342	1.10614		100.184	2.05425		73.4527	2.95663		100.263	0.684244		69.1599	2.12054
			Control	BF3.1_VS	BF3.2_VS	BF3.3_VS	BF3.4_VS	BF3_VS		10 ug/mL
		1	101.686	102.239	100.263	100.263	102.081	97.103		Anova: Single Factor
			98.3671	98.5252	103.108	97.7351	100.579	100.816
			99.9473	99.6313	103.74	102.318	99.6313	101.29		SUMMARY
		10	101.686	103.582	100.974	90.7032	99.3943	93.6265		Groups	Count	Sum	Average	Variance
			98.3671	102.002	98.9992	94.5747	103.029	86.6737		Column 1	3	300	100	2.75504
			99.9473	100.5	102.792	97.8931	99.5523	90.3871		Column 2	3	306.084	102.028	2.37425
		50	101.686	99.8683	99.8683	92.9155	103.582	82.5652		Column 3	3	302.765	100.922	3.59778
			98.3671	102.239	100.579	87.6218	102.95	80.1949		Column 4	3	283.171	94.3903	12.9491
			99.9473	103.266	100.658	87.9378	102.397	85.0145		Column 5	3	301.975	100.658	4.21996
		100	101.686	101.132	102.239	76.7975	99.4733	66.7632		Column 6	3	270.687	90.2291	12.1043
			98.3671	100.816	100.184	72.3729	100.658	69.9236
			99.9473	99.0782	98.1301	71.1878	100.658	70.7927
										ANOVA
t-Test: Two-Sample Assuming Equal Variances										Source of Variation	SS	df	MS	F	P-value	F crit
										Between Groups	327.707	5	65.5415	10.3485	0.000501437	3.10588
	Variable 1	Variable 2								Within Groups	76.0008	12	6.3334
Mean	100	90.2291
Variance	2.75504	12.1043								Total	403.708	17
Observations	3	3
Pooled Variance	7.42966									50 ug/mL
Hypothesized Mean Difference	0									Anova: Single Factor
df	4
t Stat	4.3903									SUMMARY
P(T<=t) one-tail	0.00588992									Groups	Count	Sum	Average	Variance
t Critical one-tail	2.13185									Column 1	3	300	100	2.75504
P(T<=t) two-tail	0.0117798									Column 2	3	305.373	101.791	3.03596
t Critical two-tail	2.77645									Column 3	3	301.106	100.369	0.189357
										Column 4	3	268.475	89.4917	8.81655
t-Test: Two-Sample Assuming Equal Variances					t-Test: Two-Sample Assuming Equal Variances					Column 5	3	308.928	102.976	0.351663
										Column 6	3	247.775	82.5915	5.80764
	Variable 1	Variable 2				Variable 1	Variable 2
Mean	100	89.4917			Mean	100	82.5915
Variance	2.75504	8.81655			Variance	2.75504	5.80764			ANOVA
Observations	3	3			Observations	3	3			Source of Variation	SS	df	MS	F	P-value	F crit
Pooled Variance	5.78579				Pooled Variance	4.28134				Between Groups	1017.55	5	203.51	58.2671	5.33708e-08	3.10588
Hypothesized Mean Difference	0				Hypothesized Mean Difference	0				Within Groups	41.9124	12	3.4927
df	4				df	4
t Stat	5.35053				t Stat	10.3043				Total	1059.46	17
P(T<=t) one-tail	0.00294178				P(T<=t) one-tail	0.000250188
t Critical one-tail	2.13185				t Critical one-tail	2.13185				100 ug/mL
P(T<=t) two-tail	0.00588357				P(T<=t) two-tail	0.000500377				Anova: Single Factor
t Critical two-tail	2.77645				t Critical two-tail	2.77645
										SUMMARY
t-Test: Two-Sample Assuming Equal Variances					t-Test: Two-Sample Assuming Equal Variances					Groups	Count	Sum	Average	Variance
										Column 1	3	300	100	2.75504
	Variable 1	Variable 2				Variable 1	Variable 2			Column 2	3	301.027	100.342	1.22354
Mean	100	73.4527			Mean	100	69.1599			Column 3	3	300.553	100.184	4.21996
Variance	2.75504	8.74164			Variance	2.75504	4.49671			Column 4	3	220.358	73.4527	8.74164
Observations	3	3			Observations	3	3			Column 5	3	300.79	100.263	0.46819
Pooled Variance	5.74834				Pooled Variance	3.62588				Column 6	3	207.48	69.1599	4.49671
Hypothesized Mean Difference	0				Hypothesized Mean Difference	0
df	4				df	4
t Stat	13.5611				t Stat	19.8361				ANOVA
P(T<=t) one-tail	8.55779e-05				P(T<=t) one-tail	1.90536e-05				Source of Variation	SS	df	MS	F	P-value	F crit
t Critical one-tail	2.13185				t Critical one-tail	2.13185				Between Groups	3366.65	5	673.33	184.431	6.48013e-11	3.10588
P(T<=t) two-tail	0.000171156				P(T<=t) two-tail	3.81071e-05				Within Groups	43.8101	12	3.65085
t Critical two-tail	2.77645				t Critical two-tail	2.77645
										Total	3410.46	17

## Sheet: 48h-frac
	Control			BF3.1_VS			BF3.2_VS			BF3.3_VS			BF3.4_VS			BF3_VS
1	1.323	1.364	1.342	1.365	1.329	1.366	1.354	1.374	1.379	1.323	1.361	1.367	1.347	1.363	1.412	1.346	1.313	1.342
10				1.367	1.35	1.401	1.352	1.348	1.343	1.175	1.224	1.229	1.366	1.344	1.391	1.105	1.124	1.209
50				1.364	1.349	1.374	1.371	1.384	1.346	1.073	0.985	1.148	1.354	1.382	1.388	0.946	0.91	0.997
100				1.358	1.396	1.341	1.39	1.355	1.362	0.912	0.945	0.867	1.364	1.352	1.377	0.646	0.694	0.701
	Control
	1.343
	Control			BF3.1_VS			BF3.2_VS			BF3.3_VS			BF3.4_VS			BF3_VS
1	98.5108	101.564	99.9255	101.638	98.9576	101.713	100.819	102.308	102.681	98.5108	101.34	101.787	100.298	101.489	105.138	100.223	97.7662	99.9255
10	98.5108	101.564	99.9255	101.787	100.521	104.319	100.67	100.372	100	87.4907	91.1392	91.5115	101.713	100.074	103.574	82.2785	83.6932	90.0223
50	98.5108	101.564	99.9255	101.564	100.447	102.308	102.085	103.053	100.223	79.8958	73.3433	85.4803	100.819	102.904	103.351	70.4393	67.7587	74.2368
100	98.5108	101.564	99.9255	101.117	103.946	99.8511	103.5	100.894	101.415	67.9077	70.3649	64.557	101.564	100.67	102.532	48.1013	51.6754	52.1966
	Control			BF3.1_VS			BF3.2_VS			BF3.3_VS			BF3.4_VS			BF3_VS
	average	stdev		average	stdev		average	stdev		average	stdev		average	stdev		average	stdev
1	100	1.52779		100.769	1.56956		101.936	0.985015		100.546	1.77667		102.308	2.52177		99.305	1.34097
10				102.209	1.93358		100.347	0.335759		90.0472	2.22178		101.787	1.751		85.3313	4.12364
50				101.44	0.936937		101.787	1.43806		79.5731	6.07493		102.358	1.35127		70.8116	3.25503
100				101.638	2.09682		101.936	1.37902		67.6098	2.91538		101.588	0.931		50.6577	2.22925
			Control	BF3.1_VS	BF3.2_VS	BF3.3_VS	BF3.4_VS	BF3_VS		10 ug/mL
		1	98.5108	101.638	100.819	98.5108	100.298	100.223		Anova: Single Factor
			101.564	98.9576	102.308	101.34	101.489	97.7662
			99.9255	101.713	102.681	101.787	105.138	99.9255		SUMMARY
		10	98.5108	101.787	100.67	87.4907	101.713	82.2785		Groups	Count	Sum	Average	Variance
			101.564	100.521	100.372	91.1392	100.074	83.6932		Column 1	3	300	100	2.33416
			99.9255	104.319	100	91.5115	103.574	90.0223		Column 2	3	306.627	102.209	3.73872
		50	98.5108	101.564	102.085	79.8958	100.819	70.4393		Column 3	3	301.042	100.347	0.112734
			101.564	100.447	103.053	73.3433	102.904	67.7587		Column 4	3	270.141	90.0472	4.93629
			99.9255	102.308	100.223	85.4803	103.351	74.2368		Column 5	3	305.361	101.787	3.06601
		100	98.5108	101.117	103.5	67.9077	101.564	48.1013		Column 6	3	255.994	85.3313	17.0044
			101.564	103.946	100.894	70.3649	100.67	51.6754
			99.9255	99.8511	101.415	64.557	102.532	52.1966
										ANOVA
t-Test: Two-Sample Assuming Equal Variances					t-Test: Two-Sample Assuming Equal Variances					Source of Variation	SS	df	MS	F	P-value	F crit
										Between Groups	761.669	5	152.334	29.3022	2.49615e-06	3.10588
	Variable 1	Variable 2				Variable 1	Variable 2			Within Groups	62.3846	12	5.19872
Mean	100	90.0472			Mean	100	85.3313
Variance	2.33416	4.93629			Variance	2.33416	17.0044			Total	824.053	17
Observations	3	3			Observations	3	3
Pooled Variance	3.63522				Pooled Variance	9.66929				50 ug/mL
Hypothesized Mean Difference	0				Hypothesized Mean Difference	0				Anova: Single Factor
df	4				df	4
t Stat	6.39333				t Stat	5.77748				SUMMARY
P(T<=t) one-tail	0.00153639				P(T<=t) one-tail	0.00222869				Groups	Count	Sum	Average	Variance
t Critical one-tail	2.13185				t Critical one-tail	2.13185				Column 1	3	300	100	2.33416
P(T<=t) two-tail	0.00307278				P(T<=t) two-tail	0.00445738				Column 2	3	304.319	101.44	0.87785
t Critical two-tail	2.77645				t Critical two-tail	2.77645				Column 3	3	305.361	101.787	2.06803
										Column 4	3	238.719	79.5731	36.9048
t-Test: Two-Sample Assuming Equal Variances					t-Test: Two-Sample Assuming Equal Variances					Column 5	3	307.074	102.358	1.82593
										Column 6	3	212.435	70.8116	10.5952
	Variable 1	Variable 2				Variable 1	Variable 2
Mean	100	79.5731			Mean	100	70.8116
Variance	2.33416	36.9048			Variance	2.33416	10.5952			ANOVA
Observations	3	3			Observations	3	3			Source of Variation	SS	df	MS	F	P-value	F crit
Pooled Variance	19.6195				Pooled Variance	6.46467				Between Groups	2870.78	5	574.157	63.0872	3.38661e-08	3.10588
Hypothesized Mean Difference	0				Hypothesized Mean Difference	0				Within Groups	109.212	12	9.10099
df	4				df	4
t Stat	5.64813				t Stat	14.0599				Total	2979.99	17
P(T<=t) one-tail	0.00241985				P(T<=t) one-tail	7.42481e-05
t Critical one-tail	2.13185				t Critical one-tail	2.13185				100 ug/mL
P(T<=t) two-tail	0.00483971				P(T<=t) two-tail	0.000148496				Anova: Single Factor
t Critical two-tail	2.77645				t Critical two-tail	2.77645
										SUMMARY
t-Test: Two-Sample Assuming Equal Variances					t-Test: Two-Sample Assuming Equal Variances					Groups	Count	Sum	Average	Variance
										Column 1	3	300	100	2.33416
	Variable 1	Variable 2				Variable 1	Variable 2			Column 2	3	304.914	101.638	4.39664
Mean	100	67.6098			Mean	100	50.6577			Column 3	3	305.808	101.936	1.9017
Variance	2.33416	8.49944			Variance	2.33416	4.96956			Column 4	3	202.829	67.6098	8.49944
Observations	3	3			Observations	3	3			Column 5	3	304.765	101.588	0.866761
Pooled Variance	5.4168				Pooled Variance	3.65186				Column 6	3	151.973	50.6577	4.96956
Hypothesized Mean Difference	0				Hypothesized Mean Difference	0
df	4				df	4
t Stat	17.0446				t Stat	31.6234				ANOVA
P(T<=t) one-tail	3.47432e-05				P(T<=t) one-tail	2.97989e-06				Source of Variation	SS	df	MS	F	P-value	F crit
t Critical one-tail	2.13185				t Critical one-tail	2.13185				Between Groups	7546.74	5	1509.35	394.287	7.13538e-13	3.10588
P(T<=t) two-tail	6.94864e-05				P(T<=t) two-tail	5.95978e-06				Within Groups	45.9365	12	3.82804
t Critical two-tail	2.77645				t Critical two-tail	2.77645
										Total	7592.68	17

## Sheet: 72h-frac
	Control			BF3.1_VS			BF3.2_VS			BF3.3_VS			BF3.4_VS			BF3_VS
1	1.364	1.344	1.349	1.369	1.351	1.342	1.342	1.367	1.387	1.324	1.339	1.362	1.369	1.373	1.4	1.329	1.313	1.364
10				1.405	1.387	1.366	1.358	1.403	1.396	1.135	1.119	1.11	1.338	1.367	1.402	0.945	0.969	0.937
50				1.395	1.384	1.361	1.335	1.361	1.347	0.975	1.014	0.982	1.359	1.374	1.368	0.733	0.749	0.682
100				1.379	1.358	1.399	1.366	1.378	1.375	0.738	0.782	0.765	1.331	1.403	1.37	0.351	0.297	0.265
	Control
	1.35233
	Control			BF3.1_VS			BF3.2_VS			BF3.3_VS			BF3.4_VS			BF3_VS
1	100.863	99.3838	99.7535	101.232	99.9014	99.2359	99.2359	101.085	102.563	97.9049	99.014	100.715	101.232	101.528	103.525	98.2746	97.0914	100.863
10	100.863	99.3838	99.7535	103.895	102.563	101.011	100.419	103.747	103.229	83.929	82.7459	82.0804	98.9401	101.085	103.673	69.8792	71.6539	69.2877
50	100.863	99.3838	99.7535	103.155	102.342	100.641	98.7183	100.641	99.6056	72.0976	74.9815	72.6152	100.493	101.602	101.158	54.2026	55.3858	50.4314
100	100.863	99.3838	99.7535	101.972	100.419	103.451	101.011	101.898	101.676	54.5723	57.826	56.5689	98.4225	103.747	101.306	25.9551	21.962	19.5958
	Control			BF3.1_VS			BF3.2_VS			BF3.3_VS			BF3.4_VS			BF3_VS
	average	stdev		average	stdev		average	stdev		average	stdev		average	stdev		average	stdev
1	100	0.769657		100.123	1.01659		100.961	1.66721		99.2112	1.41532		102.095	1.2469		98.7429	1.92876
10				102.49	1.44337		102.465	1.79056		82.9184	0.936328		101.232	2.36974		70.2736	1.23145
50				102.046	1.28292		99.6549	0.962249		73.2315	1.53754		101.085	0.558282		53.3399	2.58741
100				101.947	1.51605		101.528	0.461794		56.3224	1.64076		101.158	2.66514		22.5043	3.21418
			Control	BF3.1_VS	BF3.2_VS	BF3.3_VS	BF3.4_VS	BF3_VS		10 ug/mL
		1	100.863	101.232	99.2359	97.9049	101.232	98.2746		Anova: Single Factor
			99.3838	99.9014	101.085	99.014	101.528	97.0914
			99.7535	99.2359	102.563	100.715	103.525	100.863		SUMMARY
		10	100.863	103.895	100.419	83.929	98.9401	69.8792		Groups	Count	Sum	Average	Variance
			99.3838	102.563	103.747	82.7459	101.085	71.6539		Column 1	3	300	100	0.592372
			99.7535	101.011	103.229	82.0804	103.673	69.2877		Column 2	3	307.469	102.49	2.08333
		50	100.863	103.155	98.7183	72.0976	100.493	54.2026		Column 3	3	307.395	102.465	3.2061
			99.3838	102.342	100.641	74.9815	101.602	55.3858		Column 4	3	248.755	82.9184	0.876711
			99.7535	100.641	99.6056	72.6152	101.158	50.4314		Column 5	3	303.697	101.232	5.61569
		100	100.863	101.972	101.011	54.5723	98.4225	25.9551		Column 6	3	210.821	70.2736	1.51647
			99.3838	100.419	101.898	57.826	103.747	21.962
			99.7535	103.451	101.676	56.5689	101.306	19.5958
										ANOVA
t-Test: Two-Sample Assuming Equal Variances					t-Test: Two-Sample Assuming Equal Variances					Source of Variation	SS	df	MS	F	P-value	F crit
										Between Groups	2742.66	5	548.531	236.935	1.47174e-11	3.10588
	Variable 1	Variable 2				Variable 1	Variable 2			Within Groups	27.7813	12	2.31511
Mean	100	82.9184			Mean	100	70.2736
Variance	0.592372	0.876711			Variance	0.592372	1.51647			Total	2770.44	17
Observations	3	3			Observations	3	3
Pooled Variance	0.734541				Pooled Variance	1.05442				50 ug/mL
Hypothesized Mean Difference	0				Hypothesized Mean Difference	0				Anova: Single Factor
df	4				df	4
t Stat	24.4099				t Stat	35.4553				SUMMARY
P(T<=t) one-tail	8.35631e-06				P(T<=t) one-tail	1.88842e-06				Groups	Count	Sum	Average	Variance
t Critical one-tail	2.13185				t Critical one-tail	2.13185				Column 1	3	300	100	0.592372
P(T<=t) two-tail	1.67126e-05				P(T<=t) two-tail	3.77684e-06				Column 2	3	306.138	102.046	1.64588
t Critical two-tail	2.77645				t Critical two-tail	2.77645				Column 3	3	298.965	99.6549	0.925923
										Column 4	3	219.694	73.2315	2.36402
t-Test: Two-Sample Assuming Equal Variances					t-Test: Two-Sample Assuming Equal Variances					Column 5	3	303.254	101.085	0.311679
										Column 6	3	160.02	53.3399	6.69472
	Variable 1	Variable 2				Variable 1	Variable 2
Mean	100	73.2315			Mean	100	53.3399
Variance	0.592372	2.36402			Variance	0.592372	6.69472			ANOVA
Observations	3	3			Observations	3	3			Source of Variation	SS	df	MS	F	P-value	F crit
Pooled Variance	1.4782				Pooled Variance	3.64354				Between Groups	6202.36	5	1240.47	593.783	6.20815e-14	3.10588
Hypothesized Mean Difference	0				Hypothesized Mean Difference	0				Within Groups	25.0692	12	2.0891
df	4				df	4
t Stat	26.9652				t Stat	29.9384				Total	6227.43	17
P(T<=t) one-tail	5.62254e-06				P(T<=t) one-tail	3.70665e-06
t Critical one-tail	2.13185				t Critical one-tail	2.13185				100 ug/mL
P(T<=t) two-tail	1.12451e-05				P(T<=t) two-tail	7.41329e-06				Anova: Single Factor
t Critical two-tail	2.77645				t Critical two-tail	2.77645
										SUMMARY
t-Test: Two-Sample Assuming Equal Variances					t-Test: Two-Sample Assuming Equal Variances					Groups	Count	Sum	Average	Variance
										Column 1	3	300	100	0.592372
	Variable 1	Variable 2				Variable 1	Variable 2			Column 2	3	305.842	101.947	2.2984
Mean	100	56.3224			Mean	100	22.5043			Column 3	3	304.585	101.528	0.213254
Variance	0.592372	2.6921			Variance	0.592372	10.331			Column 4	3	168.967	56.3224	2.6921
Observations	3	3			Observations	3	3			Column 5	3	303.475	101.158	7.103
Pooled Variance	1.64224				Pooled Variance	5.46167				Column 6	3	67.5129	22.5043	10.331
Hypothesized Mean Difference	0				Hypothesized Mean Difference	0
df	4				df	4
t Stat	41.7433				t Stat	40.6126				ANOVA
P(T<=t) one-tail	9.84274e-07				P(T<=t) one-tail	1.09831e-06				Source of Variation	SS	df	MS	F	P-value	F crit
t Critical one-tail	2.13185				t Critical one-tail	2.13185				Between Groups	16971.6	5	3394.33	876.706	6.04949e-15	3.10588
P(T<=t) two-tail	1.96855e-06				P(T<=t) two-tail	2.19663e-06				Within Groups	46.4602	12	3.87168
t Critical two-tail	2.77645				t Critical two-tail	2.77645
										Total	17018.1	17
